# Supplementary material for: Alternative mechanisms for O2release and O–O bond formation in the oxygen evolving complex of photosystem II
Source: Royal Society of Chemistry journal article supplement (doi:10.1039/c5cp00138b), 2015-01-01
Supplement: c5cp00138b1.pdf [file c5cp00138b1.pdf]

**Supporting information for “Alternative mechanisms for O<sub>2</sub> release and O–O bond formation in the oxygen evolving complex of photosystem II.”**

Xichen Li<sup>a,b</sup> and Per E M Siegbahn<sup>b,\*</sup>

**a.** College of Chemistry, Beijing Normal University, 100875, Beijing, China.

**b.** Department of Organic Chemistry, Arrhenius Laboratory, Stockholm University, SE-106 91, Stockholm, Sweden.

- 1. Structures to build the energy diagram.**
- 2. Table S1. Energies to build the energy diagram.**
- 3. Structure of the alternative TS(O-O) (Figure 6 D).**
- 4. Table S2. Energy of the alternative TS(O-O) (Figure 6 D).**

## Structures to build the diagram

$S_3^{-1}$ , 0.0 kcal/mol on the energy diagram

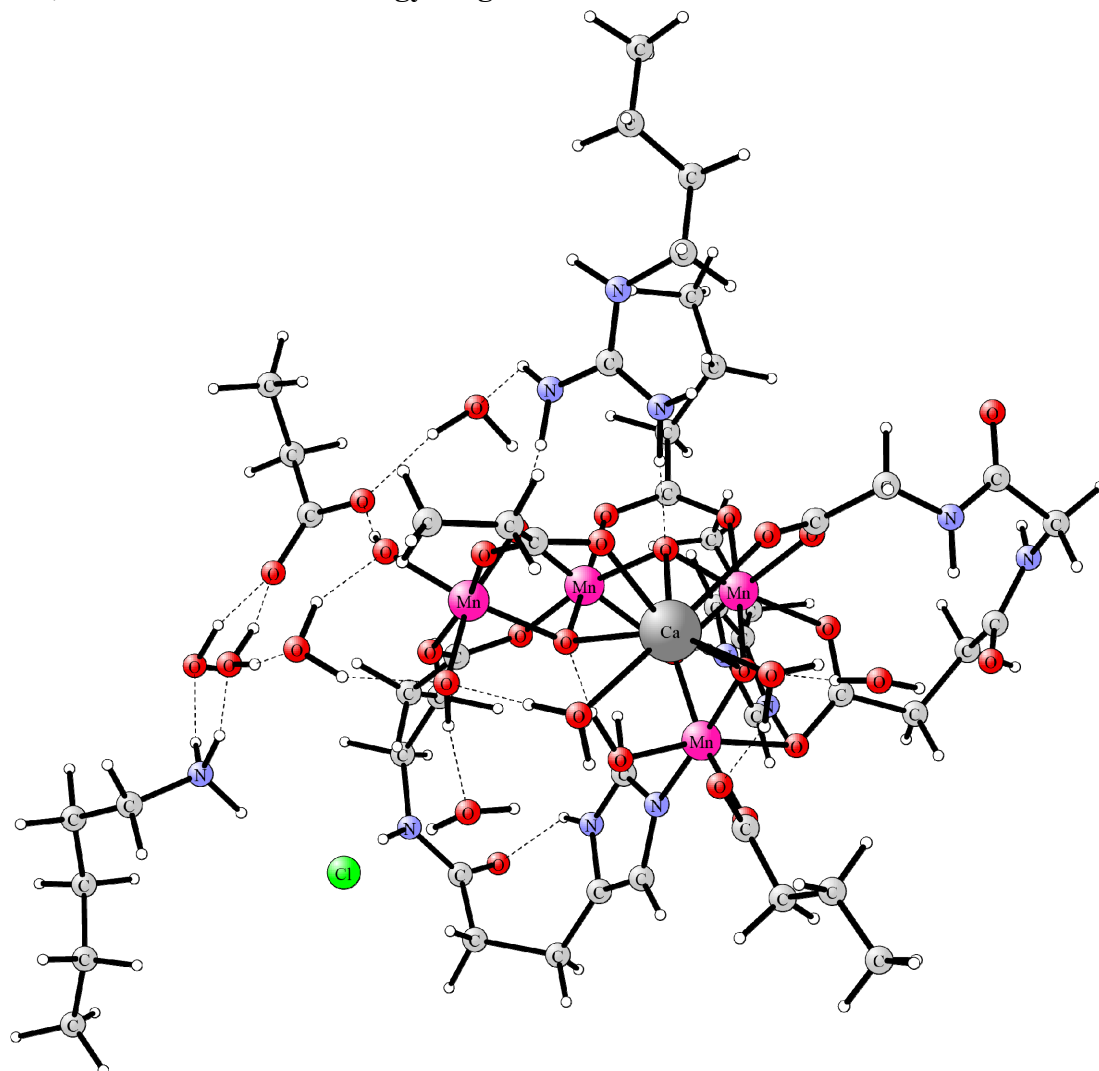

|     |             |             |            |     |            |             |             |
|-----|-------------|-------------|------------|-----|------------|-------------|-------------|
| Mn1 | 3.04066500  | -1.46515400 | 3.73137500 | O19 | 2.50573000 | 0.34846600  | 3.15837700  |
| Mn2 | 4.60411800  | -1.64433200 | 8.78861500 | C20 | 1.05826000 | 1.18299700  | 13.45631300 |
| Mn3 | 5.36904900  | -1.56791600 | 5.29652700 | H21 | 0.37022400 | 0.36013900  | 13.58246300 |
| Mn4 | 6.57524500  | -0.12777400 | 7.42807600 | H22 | 0.73364700 | 2.12912700  | 13.86357900 |
| O5  | 3.65806700  | -1.14987600 | 5.58850600 | H23 | 1.93973000 | 0.90371200  | 14.05401000 |
| O6  | 5.85375400  | 0.14717700  | 5.82946700 | C24 | 1.47650300 | 1.22277200  | 11.98197900 |
| O7  | 5.01699000  | 0.11482500  | 8.35744700 | H25 | 2.34952300 | 1.87271600  | 11.84219800 |
| O8  | 5.96955700  | -1.90810100 | 7.41956300 | H26 | 0.67593900 | 1.62250900  | 11.34915800 |
| Ca9 | 3.53443900  | 1.14366100  | 6.66025700 | C27 | 1.81719400 | -0.21173000 | 11.54515900 |
| C10 | 0.66754600  | 1.95150900  | 1.70634700 | H28 | 0.89031000 | -0.79592400 | 11.44600300 |
| H11 | 1.22518400  | 1.90580300  | 0.78257800 | H29 | 2.42065300 | -0.70830700 | 12.31183500 |
| H12 | -0.32439000 | 2.36864200  | 1.61432400 | C30 | 2.55572800 | -0.31549700 | 10.22416700 |
| H13 | 0.47832000  | 0.89465400  | 1.93999500 | O31 | 2.25207500 | 0.38538400  | 9.25188000  |
| C14 | 1.48936500  | 2.52097400  | 2.87115100 | O32 | 3.51287100 | -1.20618500 | 10.25773700 |
| H15 | 0.82513600  | 2.85001700  | 3.68164300 | C33 | 2.78445000 | -7.86080800 | 8.62574400  |
| H16 | 2.06331700  | 3.41260300  | 2.58932200 | H34 | 2.33753200 | -8.81589300 | 8.93134700  |
| C17 | 2.47950200  | 1.56031100  | 3.56929800 | H35 | 2.01729700 | -7.30640800 | 8.07771100  |
| O18 | 3.17050700  | 2.02833100  | 4.50450800 | C36 | 3.98592200 | -8.15336700 | 7.72174400  |

|     |             |             |             |      |             |              |             |
|-----|-------------|-------------|-------------|------|-------------|--------------|-------------|
| O37 | 5.09814900  | -8.44952500 | 8.20828000  | O100 | 7.35425000  | -1.94099700  | 4.88800400  |
| C38 | 3.22290000  | -7.10552900 | 9.91345500  | O101 | 8.33302200  | -0.76810100  | 6.55446300  |
| H39 | 3.89930500  | -7.75335800 | 10.48338800 | C102 | 10.81872400 | 4.22856800   | -0.81502100 |
| H40 | 2.34283800  | -6.91828900 | 10.53591100 | H103 | 11.54036400 | 3.48392200   | -0.51313100 |
| C41 | 3.89954300  | -5.79894200 | 9.60887500  | H104 | 11.20109300 | 5.23062600   | -0.68822300 |
| N42 | 4.97214400  | -5.78367700 | 8.73528800  | H105 | 10.66568500 | 4.09810800   | -1.89383600 |
| H43 | 5.40687100  | -6.64011600 | 8.38468900  | C106 | 9.49016200  | 4.00639900   | -0.07751000 |
| C44 | 3.64988600  | -4.47137200 | 9.88090800  | H107 | 9.04271100  | 3.07930600   | -0.46476700 |
| H45 | 2.89381200  | -4.02142800 | 10.50581100 | H108 | 8.78333600  | 4.81094300   | -0.32251900 |
| C46 | 5.28851600  | -4.51320600 | 8.45273800  | C109 | 9.65257600  | 3.90925000   | 1.44585800  |
| H47 | 5.96133300  | -4.22382800 | 7.66812700  | H110 | 10.08656100 | 4.84298600   | 1.82661000  |
| N48 | 4.53482000  | -3.68727300 | 9.16018800  | H111 | 10.36339900 | 3.10902300   | 1.69213600  |
| N49 | 3.79961200  | -7.95120300 | 6.40655000  | C112 | 8.34707400  | 3.66213500   | 2.21273300  |
| H50 | 2.86365400  | -7.64880400 | 6.10090700  | H113 | 7.64028100  | 4.48409900   | 2.01967500  |
| C51 | 4.91725300  | -7.84634500 | 5.46886600  | H114 | 8.55232100  | 3.64658300   | 3.28766200  |
| H52 | 4.65049000  | -8.38516900 | 4.55034300  | N115 | 7.74741900  | 2.37547200   | 1.86194800  |
| H53 | 5.77580300  | -8.34561900 | 5.92096900  | H116 | 7.76742400  | 2.09538400   | 0.89135600  |
| C54 | 5.25312700  | -6.36874800 | 5.13862400  | C117 | 6.93125000  | 1.64629900   | 2.66031400  |
| H55 | 6.12123200  | -6.35153000 | 4.46601300  | N118 | 6.54214700  | 2.13401200   | 3.84791600  |
| H56 | 5.57205100  | -5.87559000 | 6.06083500  | H119 | 6.12314300  | 1.50334600   | 4.53877700  |
| C57 | 4.08800100  | -5.57828900 | 4.51319500  | H120 | 6.41615800  | 3.12333400   | 4.00074300  |
| H58 | 3.13089800  | -5.82841600 | 4.99034800  | N121 | 6.53330600  | 0.44108400   | 2.27525600  |
| H59 | 3.95822200  | -5.82051600 | 3.45103600  | H122 | 7.08454000  | -0.21410500  | 1.70931000  |
| C60 | 4.17672500  | -4.06023100 | 4.58286700  | H123 | 5.82453800  | -0.06783000  | 2.83476300  |
| O61 | 3.23154500  | -3.42531100 | 4.03820500  | C124 | 11.84239800 | -5.39309000  | 7.24925500  |
| O62 | 5.15270400  | -3.51725200 | 5.20218900  | H125 | 11.25220200 | -5.97246100  | 6.55470800  |
| C63 | 9.15951200  | 0.11915800  | 11.44782300 | H126 | 12.79646300 | -5.85244900  | 7.46174200  |
| H64 | 9.79980200  | -0.16033900 | 10.60430300 | H127 | 12.01645800 | -4.39296800  | 6.84033200  |
| H65 | 9.75701800  | 0.00823000  | 12.36288400 | C128 | 11.16983600 | -5.34423700  | 8.63620200  |
| C66 | 7.93813400  | -0.78950700 | 11.52733000 | H129 | 11.86576400 | -4.88095300  | 9.35062600  |
| H67 | 7.23998200  | -0.42574300 | 12.28762500 | H130 | 11.02060200 | -6.37441500  | 8.98854000  |
| H68 | 8.23474700  | -1.79927300 | 11.83900400 | C131 | 9.87102900  | -4.61386000  | 8.70721900  |
| C69 | 7.15721500  | -0.91484600 | 10.22271800 | N132 | 9.07086300  | -4.63348600  | 9.84601400  |
| O70 | 7.61302600  | -0.33376100 | 9.19828100  | C133 | 9.22558500  | -3.78380700  | 7.83501100  |
| O71 | 6.12182100  | -1.64414700 | 10.25642900 | H134 | 9.48629000  | -3.49451100  | 6.83416500  |
| C72 | 8.76804900  | 1.59307200  | 11.33128600 | C135 | 7.99513400  | -3.85109300  | 9.66369000  |
| O73 | 7.64331700  | 2.00688000  | 11.62650800 | H136 | 7.19384800  | -3.66889300  | 10.36328700 |
| N74 | 9.77464000  | 2.42716800  | 10.96175300 | N137 | 8.08317700  | -3.31953300  | 8.45031900  |
| H75 | 10.61008200 | 2.02290400  | 10.56061800 | H138 | 7.33339500  | -2.70026300  | 8.01556600  |
| C76 | 9.56777800  | 3.85881500  | 10.76518900 | C139 | 6.09893600  | -4.23518800  | -1.22219700 |
| H77 | 10.51308000 | 4.37903800  | 10.92878700 | H140 | 5.38336300  | -4.56843400  | -1.95928700 |
| H78 | 8.83300900  | 4.19062100  | 11.50235800 | H141 | 7.10941700  | -4.13018100  | -1.58867200 |
| C79 | 9.10756400  | 4.16461900  | 9.32465800  | H142 | 5.79434800  | -3.22429500  | -0.92803900 |
| O80 | 9.91058800  | 4.51953600  | 8.46779000  | C143 | 6.03505200  | -5.13266000  | 0.03255000  |
| N81 | 7.77665300  | 3.98672100  | 9.10584300  | H144 | 5.95688800  | -6.19234100  | -0.23144900 |
| H82 | 7.20564200  | 3.56978400  | 9.83281900  | H145 | 6.94955500  | -4.99027400  | 0.62219800  |
| C83 | 7.19218700  | 4.06722200  | 7.78269100  | C146 | 4.85531900  | -4.70480100  | 0.91484700  |
| H84 | 6.43342300  | 4.85441600  | 7.73461700  | O147 | 4.91340100  | -3.51609300  | 1.34765900  |
| H85 | 8.00437200  | 4.31775900  | 7.09255500  | O148 | 3.90549900  | -5.51139200  | 1.14363000  |
| C86 | 6.52310300  | 2.75780500  | 7.33720600  | C149 | -1.82887500 | -11.98671700 | 4.24856800  |
| O87 | 5.42095900  | 2.81071800  | 6.77219200  | H150 | -2.35869300 | -12.71809500 | 3.65630000  |
| O88 | 7.20240800  | 1.68796300  | 7.59368200  | H151 | -2.32840600 | -11.78325000 | 5.18423400  |
| C89 | 11.58166200 | -0.61708300 | 3.48089900  | H152 | -0.85212800 | -12.41724300 | 4.50706400  |
| H90 | 12.44417500 | -1.21809300 | 3.72840300  | C153 | -1.64420000 | -10.65203200 | 3.48039500  |
| H91 | 11.83042700 | 0.38213700  | 3.15520800  | H154 | -2.52191000 | -10.47985400 | 2.84100800  |
| H92 | 11.11563300 | -1.10083700 | 2.61091700  | H155 | -1.62962500 | -9.82386700  | 4.19993400  |
| C93 | 10.52635100 | -0.45179100 | 4.58310100  | C156 | -0.36517900 | -10.58954400 | 2.62535900  |
| H94 | 9.83650100  | 0.33967300  | 4.26388500  | H157 | 0.50523900  | -10.49628100 | 3.29086600  |
| H95 | 10.97144700 | -0.09812900 | 5.51987000  | H158 | -0.23636100 | -11.54638800 | 2.09942900  |
| C96 | 9.71147700  | -1.72762000 | 4.82964600  | C159 | -0.34518200 | -9.48229900  | 1.55318900  |
| H97 | 10.29707400 | -2.41204400 | 5.45771700  | H160 | 0.56900300  | -9.57446800  | 0.95123000  |
| H98 | 9.51339100  | -2.24329600 | 3.88572800  | H161 | -1.18098300 | -9.66276600  | 0.86274100  |
| C99 | 8.35906400  | -1.45103400 | 5.47965200  | C162 | -0.47325100 | -8.02049600  | 2.00473300  |

|      |             |             |             |      |            |             |             |
|------|-------------|-------------|-------------|------|------------|-------------|-------------|
| H163 | -0.68522300 | -7.39709500 | 1.13163800  | H183 | 5.14770500 | 1.45902900  | 9.62063800  |
| H164 | -1.29056000 | -7.87943200 | 2.71716800  | H184 | 5.79319200 | 2.15574800  | 10.84721500 |
| N165 | 0.76111800  | -7.43913400 | 2.62348400  | O185 | 2.89560300 | -1.87148200 | 2.00609200  |
| H166 | 0.84983100  | -6.41075900 | 2.31466800  | H186 | 3.59711800 | -2.55392200 | 1.78539400  |
| H167 | 0.75529500  | -7.44841300 | 3.66429000  | H187 | 0.95486300 | -4.43580600 | 6.21265100  |
| H168 | 1.63981900  | -7.87267500 | 2.26487400  | O188 | 3.15716900 | -1.94042100 | 7.84686600  |
| C169 | 0.83583900  | -6.81915400 | 5.76508000  | O189 | 1.11552800 | -5.09771300 | 1.45362000  |
| O170 | 1.31174900  | -1.62548400 | 4.35081800  | H190 | 2.09183200 | -4.99890900 | 1.39532800  |
| H171 | 0.26426300  | -2.29785800 | 2.83366500  | H191 | 0.74258100 | -4.20672100 | 1.69313400  |
| O172 | 4.98819700  | -1.31539200 | 3.61650400  | O192 | 0.22282900 | -2.54747300 | 1.88664200  |
| O173 | 7.34526000  | -2.18293000 | 1.78423000  | H193 | 1.09656300 | -2.20054300 | 1.60213800  |
| H174 | 7.26026500  | -2.20519800 | 2.75444300  | O194 | 3.24696000 | -8.11409600 | 1.42447100  |
| H175 | 6.49572900  | -2.60743700 | 1.50150000  | H195 | 3.54611300 | -7.19820400 | 1.17345900  |
| O176 | 1.23583300  | 0.28112300  | 6.38463700  | H196 | 3.98443600 | -8.47751000 | 1.93557900  |
| H177 | 1.15936600  | -0.35172900 | 5.61745800  | O197 | 1.00521100 | -3.47608400 | 6.40826500  |
| H178 | 0.99339700  | -0.23792600 | 7.16908700  | H198 | 1.26701300 | -2.39532600 | 4.97899400  |
| O179 | 2.91193600  | 2.84665400  | 8.38510200  | H199 | 1.73898300 | -3.35428600 | 7.03602800  |
| H180 | 3.69269100  | 3.05290200  | 8.93654100  | H200 | 3.30997200 | -1.71572900 | 6.85206400  |
| H181 | 2.37714800  | 2.26611700  | 8.96277400  | H201 | 9.25369400 | -5.17045500 | 10.68360800 |
| O182 | 5.13379100  | 2.29133400  | 10.14277900 |      |            |             |             |

**S<sub>4</sub><sup>0</sup> RE(O–O) with the outer oxo bridge and the inner oxyl radical, <sup>14</sup>A**

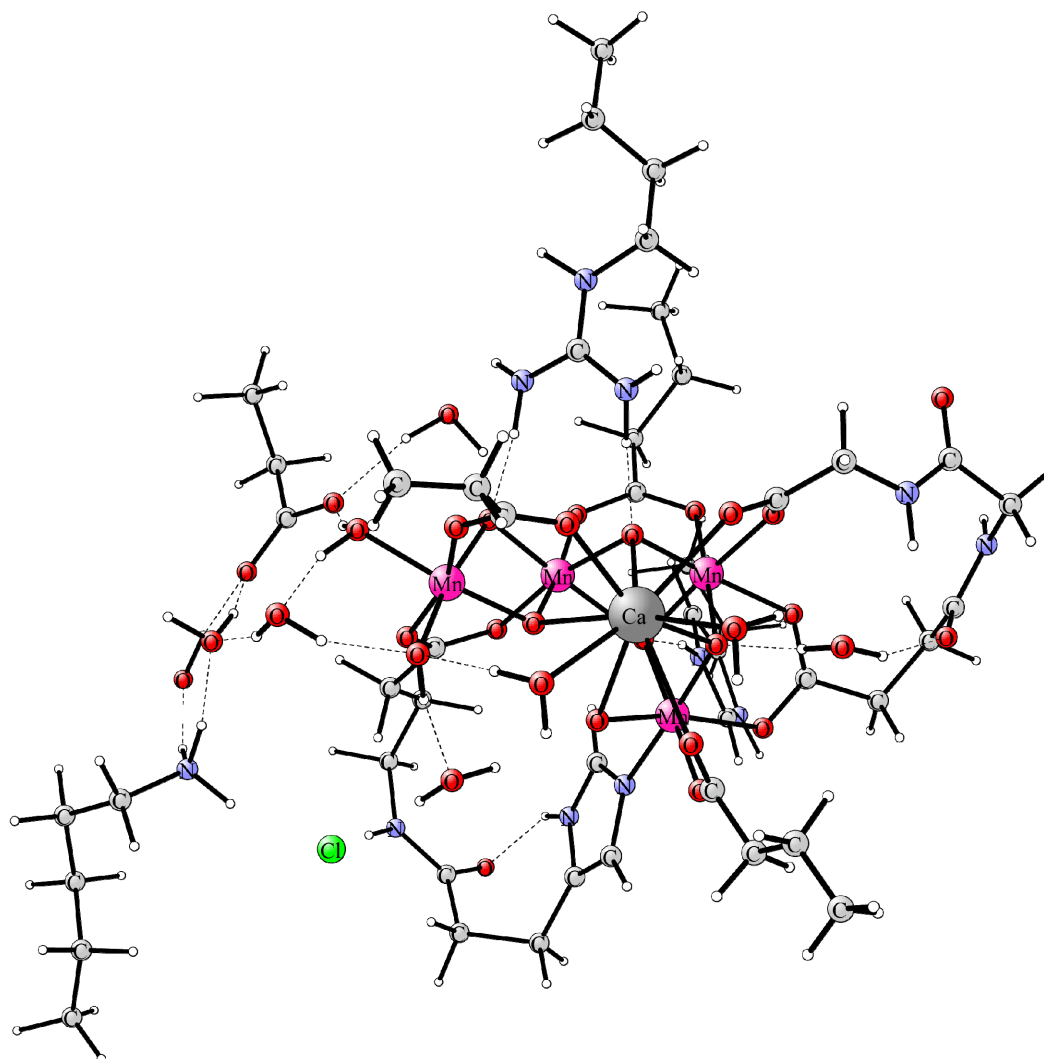

|     |             |             |             |     |            |             |             |
|-----|-------------|-------------|-------------|-----|------------|-------------|-------------|
| Mn1 | 3.03972900  | -1.43456500 | 3.81275700  | H22 | 0.73357700 | 2.12912900  | 13.86352600 |
| Mn2 | 4.65571500  | -1.56787000 | 8.73254700  | H23 | 1.94156000 | 0.90871500  | 14.05369500 |
| Mn3 | 5.33169100  | -1.54706500 | 5.32926000  | C24 | 1.47490400 | 1.24488300  | 11.98271000 |
| Mn4 | 6.58626800  | -0.05754900 | 7.40117300  | H25 | 2.28461200 | 1.97056500  | 11.83566800 |
| O5  | 3.57554500  | -1.19496700 | 5.56166400  | H26 | 0.63897300 | 1.56074200  | 11.34785900 |
| O6  | 5.76407000  | 0.17514100  | 5.83485700  | C27 | 1.95203300 | -0.14893300 | 11.56087700 |
| O7  | 5.08922000  | 0.19624000  | 8.41014700  | H28 | 1.11411500 | -0.86210200 | 11.59392900 |
| O8  | 5.94017400  | -1.85602900 | 7.38027900  | H29 | 2.69604200 | -0.53220200 | 12.26839000 |
| Ca9 | 3.35366800  | 1.04441900  | 6.85039400  | C30 | 2.54495000 | -0.24516300 | 10.17217600 |
| C10 | 0.66760800  | 1.95146100  | 1.70637800  | O31 | 2.27199100 | 0.54319000  | 9.26690000  |
| H11 | 1.22515600  | 1.90588600  | 0.78257300  | O32 | 3.35563600 | -1.27934500 | 10.05000100 |
| H12 | -0.32440200 | 2.36857900  | 1.61443100  | C33 | 2.78448100 | -7.86076200 | 8.62573900  |
| H13 | 0.46695200  | 0.89320700  | 1.92796900  | H34 | 2.39636400 | -8.82290000 | 8.98290400  |
| C14 | 1.48826300  | 2.50344800  | 2.88635500  | H35 | 1.98394100 | -7.36945100 | 8.06480300  |
| H15 | 0.82450300  | 2.89344600  | 3.66806100  | C36 | 3.99107700 | -8.12436300 | 7.72536100  |
| H16 | 2.11695400  | 3.35497700  | 2.59582300  | O37 | 5.11189400 | -8.37959200 | 8.21265600  |
| C17 | 2.41619400  | 1.52755400  | 3.65040700  | C38 | 3.19220700 | -7.01998000 | 9.87145400  |
| O18 | 2.98983500  | 1.94495600  | 4.67430400  | H39 | 3.88024000 | -7.61669600 | 10.48139800 |
| O19 | 2.53432600  | 0.32888200  | 3.18132800  | H40 | 2.30301500 | -6.82319400 | 10.47706200 |
| C20 | 1.05839900  | 1.18293600  | 13.45628300 | C41 | 3.84272500 | -5.71410600 | 9.50903300  |
| H21 | 0.37022600  | 0.36015400  | 13.58241400 | N42 | 4.94792700 | -5.71395600 | 8.67546200  |

|      |             |             |             |      |             |              |             |
|------|-------------|-------------|-------------|------|-------------|--------------|-------------|
| H43  | 5.40039400  | -6.57906700 | 8.36626600  | C106 | 9.48700400  | 4.01312800   | -0.07958700 |
| C44  | 3.56018300  | -4.38183100 | 9.71708000  | H107 | 9.04432800  | 3.07750800   | -0.45321200 |
| H45  | 2.78147000  | -3.92246500 | 10.30555500 | H108 | 8.77935700  | 4.81091300   | -0.34301000 |
| C46  | 5.25539500  | -4.45159200 | 8.35299900  | C109 | 9.64095500  | 3.94675800   | 1.44711600  |
| H47  | 5.96568400  | -4.17921400 | 7.59579400  | H110 | 10.08220900 | 4.88397800   | 1.80925000  |
| N48  | 4.45759600  | -3.61023700 | 8.99458300  | H111 | 10.34266900 | 3.14599800   | 1.71651500  |
| N49  | 3.80011000  | -7.94030900 | 6.40672600  | C112 | 8.32924000  | 3.73597200   | 2.21564200  |
| H50  | 2.86647100  | -7.64625500 | 6.09579700  | H113 | 7.63288800  | 4.55981100   | 1.99889400  |
| C51  | 4.91726000  | -7.84632400 | 5.46885700  | H114 | 8.53093900  | 3.74109300   | 3.29172700  |
| H52  | 4.65049300  | -8.39112800 | 4.55458900  | N115 | 7.71072600  | 2.44856500   | 1.88665400  |
| H53  | 5.77517500  | -8.34009000 | 5.92709300  | H116 | 7.77954300  | 2.12902700   | 0.93009200  |
| C54  | 5.26259500  | -6.37125500 | 5.12183500  | C117 | 6.87361200  | 1.74683900   | 2.67881300  |
| H55  | 6.13647200  | -6.36878800 | 4.45693600  | N118 | 6.44856600  | 2.26052200   | 3.84376300  |
| H56  | 5.57631100  | -5.86742300 | 6.03917000  | H119 | 6.00062200  | 1.65446200   | 4.53512700  |
| C57  | 4.10739000  | -5.57819400 | 4.47542100  | H120 | 6.38537000  | 3.25636800   | 3.99156800  |
| H58  | 3.14148600  | -5.83287800 | 4.93358800  | N121 | 6.47212300  | 0.53365500   | 2.31118800  |
| H59  | 3.99650400  | -5.82820600 | 3.41346300  | H122 | 7.01155000  | -0.11851600  | 1.73576200  |
| C60  | 4.18087400  | -4.05792700 | 4.55782300  | H123 | 5.76400500  | 0.03572600   | 2.86942900  |
| O61  | 3.23902800  | -3.41905800 | 3.99764400  | C124 | 11.84238000 | -5.39307400  | 7.24925300  |
| O62  | 5.13166400  | -3.50932500 | 5.20318300  | H125 | 11.25221000 | -5.97248800  | 6.55472300  |
| C63  | 9.15938800  | 0.11919500  | 11.44783900 | H126 | 12.79648000 | -5.85245200  | 7.46172900  |
| H64  | 9.82459500  | -0.16046400 | 10.62390400 | H127 | 12.01999600 | -4.39322400  | 6.84097000  |
| H65  | 9.72769700  | 0.00262300  | 12.37996600 | C128 | 11.17784900 | -5.34398400  | 8.64037700  |
| C66  | 7.93320400  | -0.78972100 | 11.49265900 | H129 | 11.87809300 | -4.88325700  | 9.35171200  |
| H67  | 7.22444100  | -0.43552800 | 12.24756700 | H130 | 11.02552000 | -6.37296500  | 8.99351100  |
| H68  | 8.22304800  | -1.80406200 | 11.79593000 | C131 | 9.88198400  | -4.61023000  | 8.71762300  |
| C69  | 7.16749600  | -0.90117500 | 10.17935700 | N132 | 9.05057800  | -4.68023000  | 9.83156400  |
| O70  | 7.64276100  | -0.34069400 | 9.15318800  | C133 | 9.26301900  | -3.73892500  | 7.86629700  |
| O71  | 6.11018800  | -1.61257500 | 10.20204000 | H134 | 9.55647400  | -3.39218500  | 6.89276400  |
| C72  | 8.76744800  | 1.59212600  | 11.32047200 | C135 | 7.98050400  | -3.89007700  | 9.65949200  |
| O73  | 7.62707700  | 1.99405100  | 11.57145400 | H136 | 7.16394500  | -3.73837200  | 10.34806100 |
| N74  | 9.77809600  | 2.43046900  | 10.98295400 | N137 | 8.10248300  | -3.30600000  | 8.47142400  |
| H75  | 10.64301700 | 2.03316400  | 10.64193400 | H138 | 7.37982900  | -2.67770800  | 8.04580400  |
| C76  | 9.56774000  | 3.85878700  | 10.76514800 | C139 | 6.09883400  | -4.23516400  | -1.22212100 |
| H77  | 10.51495900 | 4.38048100  | 10.90841000 | H140 | 5.38340000  | -4.56850100  | -1.95931000 |
| H78  | 8.84133100  | 4.20878200  | 11.50238300 | H141 | 7.10939600  | -4.13018100  | -1.58861700 |
| C79  | 9.09543900  | 4.12930300  | 9.31848500  | H142 | 5.79573000  | -3.22082800  | -0.93807000 |
| O80  | 9.89576500  | 4.40783800  | 8.43371900  | C143 | 6.02765300  | -5.12258400  | 0.03892000  |
| N81  | 7.75079000  | 4.00504900  | 9.12375800  | H144 | 6.02863800  | -6.18705500  | -0.21433500 |
| H82  | 7.17233900  | 3.64488400  | 9.87362500  | H145 | 6.89568400  | -4.91232600  | 0.67492400  |
| C83  | 7.14729700  | 4.08676800  | 7.80961300  | C146 | 4.77345500  | -4.75333000  | 0.82812300  |
| H84  | 6.38701800  | 4.87303600  | 7.77371300  | O147 | 4.73427000  | -3.57161400  | 1.27114500  |
| H85  | 7.95197300  | 4.33722200  | 7.11048100  | O148 | 3.83393400  | -5.60378900  | 0.96278100  |
| C86  | 6.47484200  | 2.77874400  | 7.36509600  | C149 | -1.82882600 | -11.98664800 | 4.24855400  |
| O87  | 5.33886200  | 2.79502500  | 6.87774100  | H150 | -2.35871200 | -12.71804600 | 3.65626700  |
| O88  | 7.20901600  | 1.71705900  | 7.54045100  | H151 | -2.32839800 | -11.78327900 | 5.18423700  |
| C89  | 11.58170000 | -0.61714500 | 3.48091200  | H152 | -0.84826100 | -12.41068000 | 4.50202600  |
| H90  | 12.44423300 | -1.21806300 | 3.72839100  | C153 | -1.66401000 | -10.64946600 | 3.49168500  |
| H91  | 11.83038900 | 0.38213300  | 3.15519200  | H154 | -2.58263700 | -10.44246900 | 2.92405800  |
| H92  | 11.11875500 | -1.09760900 | 2.60737300  | H155 | -1.57434300 | -9.83752100  | 4.22514300  |
| C93  | 10.52696200 | -0.46040200 | 4.58780500  | C156 | -0.45365400 | -10.60091600 | 2.54461600  |
| H94  | 9.89120000  | 0.39527400  | 4.32804600  | H157 | 0.46983500  | -10.55622100 | 3.14030000  |
| H95  | 10.98473200 | -0.20708200 | 5.55032400  | H158 | -0.39533100 | -11.53821200 | 1.97471900  |
| C96  | 9.62629300  | -1.69360600 | 4.72852600  | C159 | -0.49439400 | -9.45023600  | 1.52244000  |
| H97  | 10.16009900 | -2.48500400 | 5.27299900  | H160 | 0.38273100  | -9.50106500  | 0.86302800  |
| H98  | 9.38480400  | -2.10749300 | 3.74513100  | H161 | -1.36975400 | -9.59756600  | 0.87587000  |
| C99  | 8.29919900  | -1.40527800 | 5.41816500  | C162 | -0.60830000 | -8.02312400  | 2.07084300  |
| O100 | 7.27378500  | -1.90662800 | 4.86743800  | H163 | -0.89573900 | -7.34870500  | 1.25957800  |
| O101 | 8.29498700  | -0.70720400 | 6.48200200  | H164 | -1.36891000 | -7.94016500  | 2.85011700  |
| C102 | 10.81872400 | 4.22856600  | -0.81502900 | N165 | 0.67431000  | -7.47121200  | 2.64020900  |
| H103 | 11.54037600 | 3.48391700  | -0.51315900 | H166 | 0.83143400  | -6.51014500  | 2.25933500  |
| H104 | 11.20108900 | 5.23062800  | -0.68819800 | H167 | 0.67172300  | -7.37574200  | 3.68471700  |
| H105 | 10.66522000 | 4.09781100  | -1.89329000 | H168 | 1.52426700  | -7.99262000  | 2.33953500  |

|       |            |             |             |      |            |             |             |
|-------|------------|-------------|-------------|------|------------|-------------|-------------|
| C1169 | 0.86954700 | -6.64004900 | 5.68256900  | H186 | 3.48239100 | -2.61997500 | 1.65466200  |
| O170  | 1.28143500 | -1.63959000 | 4.28829200  | H187 | 1.03539300 | -4.26319600 | 6.26142000  |
| H171  | 0.35764400 | -2.21311900 | 2.74770300  | O188 | 3.18464500 | -1.57853500 | 7.70810100  |
| O172  | 4.93694700 | -1.29218200 | 3.63858600  | O189 | 1.26196000 | -5.08756900 | 1.29591400  |
| O173  | 7.17425100 | -2.14466800 | 1.77406100  | H190 | 2.26989900 | -5.13844200 | 1.26709800  |
| H174  | 7.08495200 | -2.17982400 | 2.74294900  | H191 | 0.99838800 | -5.13506500 | 0.36250300  |
| H175  | 6.33218200 | -2.56058900 | 1.47532700  | O192 | 0.35698100 | -2.48940000 | 1.80257300  |
| O176  | 1.04406700 | 0.24689700  | 6.35779700  | H193 | 0.52355900 | -3.45730400 | 1.81158700  |
| H177  | 1.01900300 | -0.33458000 | 5.55499200  | H194 | 1.90894100 | -2.07116500 | 1.67850300  |
| H178  | 0.70725200 | -0.32221100 | 7.06834300  | O195 | 3.12396100 | -8.18018000 | 1.49396700  |
| O179  | 2.88427600 | 2.99629600  | 8.35421900  | H196 | 3.51725400 | -7.32196900 | 1.19809800  |
| H180  | 3.70882300 | 3.23854100  | 8.81769900  | H197 | 3.86043300 | -8.79912000 | 1.59246900  |
| H181  | 2.35045500 | 2.56635900  | 9.04636300  | O198 | 1.06329800 | -3.29607200 | 6.42505300  |
| O182  | 5.11437000 | 2.39864200  | 10.17243500 | H199 | 1.21023500 | -2.36496300 | 4.97478700  |
| H183  | 5.16331500 | 1.57293400  | 9.64574900  | H200 | 1.90171300 | -3.09798700 | 6.87983600  |
| H184  | 5.78576900 | 2.27865300  | 10.86883300 | H201 | 9.21552200 | -5.25256800 | 10.65029300 |
| O185  | 2.87922800 | -1.84322400 | 1.87969400  |      |            |             |             |

**S<sub>4</sub><sup>0</sup> RE(O–O) with the outer oxo bridge and the inner oxyl radical, <sup>12</sup>A**

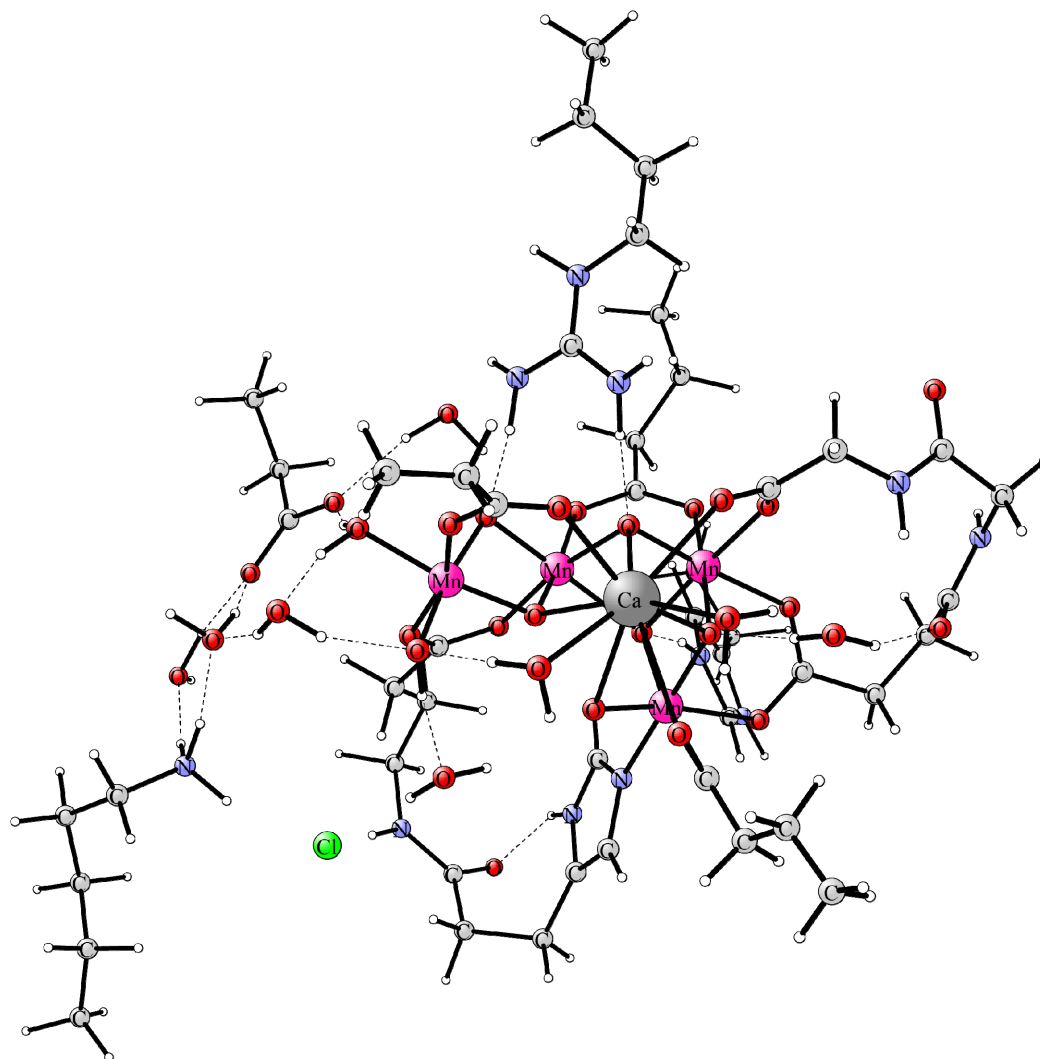

|     |             |             |             |     |            |             |             |
|-----|-------------|-------------|-------------|-----|------------|-------------|-------------|
| Mn1 | 3.04308000  | -1.43976300 | 3.89960400  | H22 | 0.73364700 | 2.12912700  | 13.86357900 |
| Mn2 | 4.59808600  | -1.53296600 | 8.65785200  | H23 | 1.94108400 | 0.90637000  | 14.05278000 |
| Mn3 | 5.39023300  | -1.51639700 | 5.33459400  | C24 | 1.47589100 | 1.24090900  | 11.98275900 |
| Mn4 | 6.61307800  | -0.03733100 | 7.39988400  | H25 | 2.31871500 | 1.93032600  | 11.84528900 |
| O5  | 3.64878200  | -1.13297400 | 5.62371200  | H26 | 0.65655500 | 1.60311900  | 11.35103100 |
| O6  | 5.83395600  | 0.19914300  | 5.80435700  | C27 | 1.88524800 | -0.17293400 | 11.54405400 |
| O7  | 5.08939100  | 0.22476500  | 8.35940300  | H28 | 0.99439400 | -0.81731400 | 11.49656900 |
| O8  | 5.96540700  | -1.82845400 | 7.35358000  | H29 | 2.55395400 | -0.62439800 | 12.28387800 |
| Ca9 | 3.41539900  | 1.14614700  | 6.81799900  | C30 | 2.56066100 | -0.25657600 | 10.19037000 |
| C10 | 0.66754600  | 1.95151000  | 1.70634700  | O31 | 2.22577500 | 0.46095000  | 9.23908900  |
| H11 | 1.22518400  | 1.90580300  | 0.78257800  | O32 | 3.50526900 | -1.16351200 | 10.15713100 |
| H12 | -0.32439000 | 2.36864100  | 1.61432400  | C33 | 2.78445000 | -7.86080800 | 8.62574400  |
| H13 | 0.46696700  | 0.89332400  | 1.92900100  | H34 | 2.42273900 | -8.82713100 | 8.99876000  |
| C14 | 1.48525900  | 2.50357400  | 2.88895200  | H35 | 1.97102500 | -7.40227400 | 8.05570200  |
| H15 | 0.81415200  | 2.87830700  | 3.67284200  | C36 | 3.99755700 | -8.10721000 | 7.72914600  |
| H16 | 2.10227100  | 3.36554500  | 2.60660100  | O37 | 5.12309600 | -8.33535500 | 8.21929900  |
| C17 | 2.42641200  | 1.53966600  | 3.65407900  | C38 | 3.16287700 | -6.98690900 | 9.85841600  |
| O18 | 3.07199400  | 1.99596600  | 4.61889800  | H39 | 3.85580500 | -7.55784500 | 10.48728300 |
| O19 | 2.47078300  | 0.31126600  | 3.25950400  | H40 | 2.26328800 | -6.79763300 | 10.45084100 |
| C20 | 1.05826000  | 1.18299700  | 13.45631400 | C41 | 3.79322600 | -5.67567100 | 9.48031500  |
| H21 | 0.37022400  | 0.36013900  | 13.58246300 | N42 | 4.91834800 | -5.67301100 | 8.67412600  |



|      |             |             |             |      |             |              |             |
|------|-------------|-------------|-------------|------|-------------|--------------|-------------|
| H43  | 5.38612700  | -6.53761800 | 8.38526600  | C106 | 9.48386200  | 4.01401300   | -0.08729400 |
| C44  | 3.48572600  | -4.34410900 | 9.65817900  | H107 | 9.04829500  | 3.07269600   | -0.45484300 |
| H45  | 2.69220700  | -3.88676500 | 10.22859000 | H108 | 8.77489800  | 4.80606700   | -0.36428800 |
| C46  | 5.21474600  | -4.41194000 | 8.33720100  | C109 | 9.62601100  | 3.96432200   | 1.44077900  |
| H47  | 5.94175000  | -4.13971200 | 7.59642200  | H110 | 10.06202400 | 4.90657300   | 1.79616500  |
| N48  | 4.38839200  | -3.57178900 | 8.94251700  | H111 | 10.32694100 | 3.16801400   | 1.72493500  |
| N49  | 3.80275800  | -7.94146300 | 6.40848300  | C112 | 8.30792400  | 3.75957900   | 2.19880800  |
| H50  | 2.86191100  | -7.67736200 | 6.08878200  | H113 | 7.61324800  | 4.58124300   | 1.96882600  |
| C51  | 4.91725300  | -7.84634500 | 5.46886600  | H114 | 8.50008000  | 3.77421000   | 3.27651900  |
| H52  | 4.64276800  | -8.38160400 | 4.55145000  | N115 | 7.69226600  | 2.46937300   | 1.87613300  |
| H53  | 5.77324900  | -8.35213800 | 5.91793200  | H116 | 7.76331700  | 2.14276500   | 0.92215600  |
| C54  | 5.27926800  | -6.37286700 | 5.13470100  | C117 | 6.85417000  | 1.77476600   | 2.67384200  |
| H55  | 6.14921700  | -6.37395600 | 4.46492900  | N118 | 6.43107900  | 2.29933900   | 3.83334400  |
| H56  | 5.60550000  | -5.88288600 | 6.05533500  | H119 | 5.98978700  | 1.69751700   | 4.53149700  |
| C57  | 4.12900100  | -5.56290500 | 4.50236900  | H120 | 6.36558300  | 3.29606000   | 3.97331600  |
| H58  | 3.16108800  | -5.82426800 | 4.95116800  | N121 | 6.45171300  | 0.55819100   | 2.31705500  |
| H59  | 4.01897100  | -5.79185200 | 3.43496500  | H122 | 6.99061600  | -0.09780200  | 1.74463100  |
| C60  | 4.21205700  | -4.04479100 | 4.60645100  | H123 | 5.74355100  | 0.06512100   | 2.87898700  |
| O61  | 3.24556200  | -3.40304400 | 4.08461000  | C124 | 11.84239800 | -5.39309000  | 7.24925500  |
| O62  | 5.18041300  | -3.49929100 | 5.21971100  | H125 | 11.25220200 | -5.97246100  | 6.55470800  |
| C63  | 9.15951200  | 0.11915800  | 11.44782300 | H126 | 12.79646300 | -5.85244900  | 7.46174200  |
| H64  | 9.83664200  | -0.15708400 | 10.63238600 | H127 | 12.01860100 | -4.39215400  | 6.84316600  |
| H65  | 9.71403200  | -0.00028300 | 12.38783200 | C128 | 11.17242200 | -5.34931200  | 8.63899800  |
| C66  | 7.93204000  | -0.79330900 | 11.47312700 | H129 | 11.86870200 | -4.88896100  | 9.35449900  |
| H67  | 7.21785100  | -0.44512900 | 12.22591200 | H130 | 11.02223400 | -6.38007400  | 8.98790700  |
| H68  | 8.22243900  | -1.80826600 | 11.77384200 | C131 | 9.87380400  | -4.61890100  | 8.71544900  |
| C69  | 7.16708500  | -0.90159900 | 10.15519500 | N132 | 9.04515600  | -4.68274100  | 9.83212000  |
| O70  | 7.64132000  | -0.30498900 | 9.14219600  | C133 | 9.25193100  | -3.75237600  | 7.86166600  |
| O71  | 6.12838700  | -1.62897600 | 10.15287900 | H134 | 9.54118800  | -3.41436500  | 6.88424100  |
| C72  | 8.76717300  | 1.59205200  | 11.32059000 | C135 | 7.97568200  | -3.89134100  | 9.65997800  |
| O73  | 7.62969300  | 1.99696400  | 11.58036800 | H136 | 7.16219800  | -3.73093100  | 10.35050200 |
| N74  | 9.77608500  | 2.42909000  | 10.97389100 | N137 | 8.09391800  | -3.31424700  | 8.46826900  |
| H75  | 10.63823200 | 2.03127000  | 10.62665500 | H138 | 7.37788200  | -2.67522600  | 8.04712500  |
| C76  | 9.56777800  | 3.85881500  | 10.76518900 | C139 | 6.09893600  | -4.23518800  | -1.22219700 |
| H77  | 10.51539600 | 4.37863400  | 10.91356100 | H140 | 5.38336300  | -4.56843400  | -1.95928700 |
| H78  | 8.84134500  | 4.20411700  | 11.50455100 | H141 | 7.10941700  | -4.13018100  | -1.58867200 |
| C79  | 9.09762900  | 4.14196200  | 9.32149600  | H142 | 5.79761700  | -3.21666700  | -0.94910800 |
| O80  | 9.89836700  | 4.43212700  | 8.44039100  | C143 | 6.01581400  | -5.10489500  | 0.05031900  |
| N81  | 7.75326500  | 4.02098500  | 9.12509500  | H144 | 6.01194400  | -6.17285000  | -0.18791600 |
| H82  | 7.17609200  | 3.64586500  | 9.86886400  | H145 | 6.88306400  | -4.89118200  | 0.68623800  |
| C83  | 7.15322600  | 4.11457300  | 7.81083700  | C146 | 4.76177400  | -4.72333800  | 0.83782400  |
| H84  | 6.38395900  | 4.89217700  | 7.78324700  | O147 | 4.72559000  | -3.53862500  | 1.27532100  |
| H85  | 7.95700000  | 4.38372000  | 7.11746200  | O148 | 3.82246300  | -5.57161000  | 0.98522100  |
| C86  | 6.49720200  | 2.80595200  | 7.34650300  | C149 | -1.82887600 | -11.98671800 | 4.24856800  |
| O87  | 5.37235500  | 2.82476100  | 6.83119100  | H150 | -2.35869300 | -12.71809500 | 3.65630100  |
| O88  | 7.22703600  | 1.74559200  | 7.53726400  | H151 | -2.32840600 | -11.78325000 | 5.18423400  |
| C89  | 11.58166200 | -0.61708300 | 3.48089900  | H152 | -0.85027700 | -12.41406600 | 4.50463200  |
| H90  | 12.44417500 | -1.21809300 | 3.72840300  | C153 | -1.65412800 | -10.65668000 | 3.48212300  |
| H91  | 11.83042700 | 0.38213700  | 3.15520800  | H154 | -2.57379100 | -10.44322600 | 2.91856000  |
| H92  | 11.11751100 | -1.09810800 | 2.60827700  | H155 | -1.54759100 | -9.83851700  | 4.20652600  |
| C93  | 10.53001800 | -0.45489300 | 4.58403000  | C156 | -0.44910900 | -10.64026800 | 2.52638600  |
| H94  | 9.86990300  | 0.37388200  | 4.29829600  | H157 | 0.47777800  | -10.57960100 | 3.11531100  |
| H95  | 10.98233600 | -0.15886100 | 5.53679500  | H158 | -0.39639300 | -11.59667000 | 1.98851600  |
| C96  | 9.66757400  | -1.70896800 | 4.76843400  | C159 | -0.48915500 | -9.52836900  | 1.46264400  |
| H97  | 10.22054700 | -2.45234400 | 5.35785000  | H160 | 0.38756500  | -9.60537000  | 0.80537600  |
| H98  | 9.44709200  | -2.17219100 | 3.80251200  | H161 | -1.36490900 | -9.69874500  | 0.82213300  |
| C99  | 8.33447600  | -1.40604300 | 5.43292200  | C162 | -0.60235400 | -8.08003200  | 1.95049800  |
| O100 | 7.30935800  | -1.88079600 | 4.85302200  | H163 | -0.85571800 | -7.43752100  | 1.10258600  |
| O101 | 8.32664900  | -0.71465300 | 6.49885700  | H164 | -1.38504100 | -7.95655000  | 2.70249600  |
| C102 | 10.81872500 | 4.22856900  | -0.81502100 | N165 | 0.66678100  | -7.51803600  | 2.53588100  |
| H103 | 11.54036400 | 3.48392200  | -0.51313100 | H166 | 0.78738000  | -6.53098600  | 2.21451200  |
| H104 | 11.20109300 | 5.23062600  | -0.68822400 | H167 | 0.67771200  | -7.48221900  | 3.58254300  |
| H105 | 10.66947300 | 4.09812300  | -1.89414300 | H168 | 1.52912400  | -7.99112500  | 2.18524800  |

|       |            |             |             |      |            |             |             |
|-------|------------|-------------|-------------|------|------------|-------------|-------------|
| C1169 | 0.87438400 | -6.75844700 | 5.59715300  | H186 | 3.48631200 | -2.60563900 | 1.72804800  |
| O170  | 1.29652400 | -1.65818600 | 4.41396000  | H187 | 1.00334400 | -4.44055700 | 6.18627300  |
| H171  | 0.35460000 | -2.19738400 | 2.85945900  | O188 | 3.20847700 | -1.53572900 | 7.67697600  |
| O172  | 4.93048400 | -1.28857600 | 3.65131500  | O189 | 1.24340000 | -5.05581100 | 1.32662100  |
| O173  | 7.17371700 | -2.10888600 | 1.76083300  | H190 | 2.24993900 | -5.11115200 | 1.29725700  |
| H174  | 7.10935700 | -2.15229400 | 2.73126000  | H191 | 0.98002400 | -5.05027500 | 0.39192100  |
| H175  | 6.32479300 | -2.52081900 | 1.47781800  | O192 | 0.35889400 | -2.46841900 | 1.91310300  |
| O176  | 1.10461800 | 0.34546000  | 6.38583400  | H193 | 0.51253200 | -3.43857900 | 1.91415700  |
| H177  | 1.05222000 | -0.31459800 | 5.64689000  | H194 | 1.90213700 | -2.06284300 | 1.78333800  |
| H178  | 0.79444000 | -0.13395400 | 7.17105900  | O195 | 3.06763300 | -8.17772700 | 1.26393500  |
| O179  | 2.90344900 | 2.95878900  | 8.45591700  | H196 | 3.46556000 | -7.29730000 | 1.04874800  |
| H180  | 3.69509100 | 3.14588900  | 9.00088400  | H197 | 3.80881700 | -8.75670000 | 1.49076000  |
| H181  | 2.31996800 | 2.47293200  | 9.06774100  | O198 | 1.05187300 | -3.48559900 | 6.41240800  |
| O182  | 5.12610800 | 2.37692500  | 10.17001600 | H199 | 1.22474300 | -2.42126600 | 5.05750700  |
| H183  | 5.18696100 | 1.54764100  | 9.65010400  | H200 | 1.88554500 | -3.35020700 | 6.89252900  |
| H184  | 5.78083300 | 2.26719200  | 10.88396000 | H201 | 9.21217500 | -5.25053300 | 10.65361900 |
| O185  | 2.87725200 | -1.83754600 | 1.97685800  |      |            |             |             |

$S_4^0$  RE(O-O) with the outer oxo bridge and the inner oxyl radical,  ${}^6A$

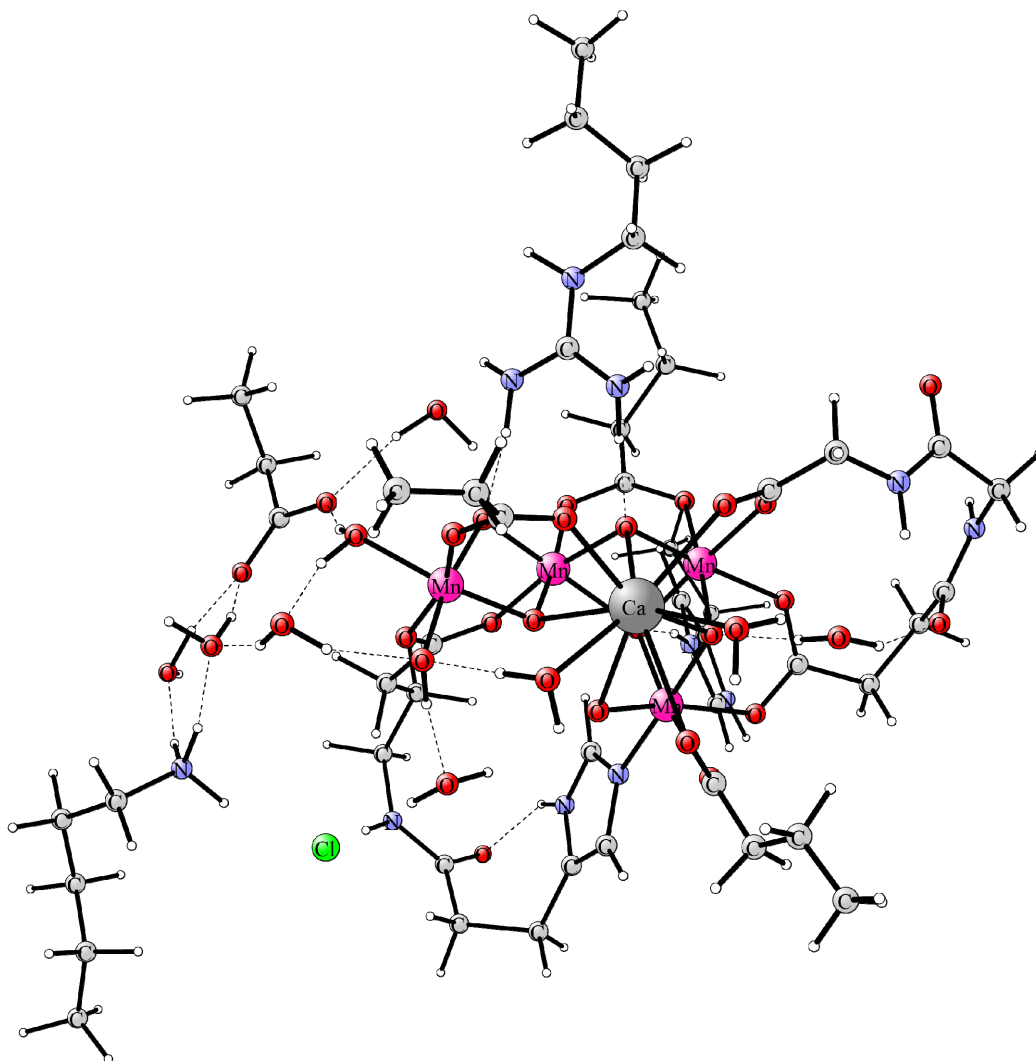

|     |             |             |             |     |            |             |             |
|-----|-------------|-------------|-------------|-----|------------|-------------|-------------|
| Mn1 | 3.03730100  | -1.44024500 | 3.86867000  | H22 | 0.73364700 | 2.12912700  | 13.86357900 |
| Mn2 | 4.60364800  | -1.52129800 | 8.66436200  | H23 | 1.94044200 | 0.90641600  | 14.05384400 |
| Mn3 | 5.38187500  | -1.52299100 | 5.33956400  | C24 | 1.47720900 | 1.23940800  | 11.98404200 |
| Mn4 | 6.61600800  | -0.03708600 | 7.39948500  | H25 | 2.32106500 | 1.92753900  | 11.84651900 |
| O5  | 3.63681200  | -1.18458600 | 5.61225900  | H26 | 0.65928100 | 1.60088600  | 11.35017300 |
| O6  | 5.81562200  | 0.19717900  | 5.81627700  | C27 | 1.88524600 | -0.17595800 | 11.54931900 |
| O7  | 5.10326000  | 0.23312000  | 8.37271700  | H28 | 0.99348900 | -0.81890600 | 11.50110500 |
| O8  | 5.95975300  | -1.82799500 | 7.35484700  | H29 | 2.55285700 | -0.62692600 | 12.29030600 |
| Ca9 | 3.42367000  | 1.13050500  | 6.81087100  | C30 | 2.56142300 | -0.25809100 | 10.19707300 |
| C10 | 0.66754600  | 1.95151000  | 1.70634700  | O31 | 2.22325800 | 0.45620800  | 9.24519100  |
| H11 | 1.22518400  | 1.90580300  | 0.78257800  | O32 | 3.51259900 | -1.15901600 | 10.16479800 |
| H12 | -0.32439000 | 2.36864100  | 1.61432400  | C33 | 2.78445000 | -7.86080800 | 8.62574400  |
| H13 | 0.46619000  | 0.89351800  | 1.92829000  | H34 | 2.42932900 | -8.82715700 | 9.00484900  |
| C14 | 1.48643100  | 2.50120600  | 2.88847800  | H35 | 1.96757400 | -7.41051600 | 8.05381400  |
| H15 | 0.81719600  | 2.87230100  | 3.67577100  | C36 | 3.99820100 | -8.10419600 | 7.72952400  |
| H16 | 2.10363900  | 3.36375700  | 2.60837400  | O37 | 5.12501600 | -8.32428500 | 8.22075800  |
| C17 | 2.42592400  | 1.52894600  | 3.64263600  | C38 | 3.15908400 | -6.97738200 | 9.85274500  |
| O18 | 3.08064800  | 1.97160200  | 4.60741400  | H39 | 3.85409500 | -7.54157700 | 10.48540700 |
| O19 | 2.45703300  | 0.30406800  | 3.23681700  | H40 | 2.25861600 | -6.78843700 | 10.44403400 |
| C20 | 1.05826000  | 1.18299700  | 13.45631400 | C41 | 3.78472100 | -5.66515000 | 9.46888400  |
| H21 | 0.37022400  | 0.36013900  | 13.58246300 | N42 | 4.90735300 | -5.66136500 | 8.65875000  |

|      |             |             |             |      |             |              |             |
|------|-------------|-------------|-------------|------|-------------|--------------|-------------|
| H43  | 5.37689500  | -6.52549600 | 8.37081500  | C106 | 9.48726800  | 4.01390500   | -0.08040700 |
| C44  | 3.47636500  | -4.33379100 | 9.64691600  | H107 | 9.04122100  | 3.08114200   | -0.45706500 |
| H45  | 2.68433100  | -3.87693400 | 10.21975600 | H108 | 8.78196300  | 4.81511900   | -0.33964600 |
| C46  | 5.20199600  | -4.40022600 | 8.32114200  | C109 | 9.64472600  | 3.94082800   | 1.44509600  |
| H47  | 5.92856900  | -4.12633000 | 7.58028400  | H110 | 10.09368600 | 4.87349700   | 1.80949900  |
| N48  | 4.37647100  | -3.56077500 | 8.92866400  | H111 | 10.34148700 | 3.13405800   | 1.70947300  |
| N49  | 3.80325800  | -7.94143600 | 6.40905300  | C112 | 8.33402500  | 3.73631800   | 2.21554000  |
| H50  | 2.86149600  | -7.68367500 | 6.08791700  | H113 | 7.64346900  | 4.56677100   | 2.00531000  |
| C51  | 4.91725300  | -7.84634500 | 5.46886600  | H114 | 8.53889600  | 3.73421500   | 3.29098000  |
| H52  | 4.64343800  | -8.38627000 | 4.55403000  | N115 | 7.70427000  | 2.45550200   | 1.88236000  |
| H53  | 5.77424400  | -8.34906500 | 5.91965400  | H116 | 7.76450000  | 2.13962100   | 0.92402500  |
| C54  | 5.27743500  | -6.37485000 | 5.12828400  | C117 | 6.86011500  | 1.76484600   | 2.67673100  |
| H55  | 6.14803300  | -6.37905100 | 4.45931000  | N118 | 6.45091800  | 2.28398300   | 3.84369000  |
| H56  | 5.60275100  | -5.87953700 | 6.04632300  | H119 | 6.00277700  | 1.68281700   | 4.53837700  |
| C57  | 4.12710700  | -5.56998500 | 4.49107000  | H120 | 6.39968600  | 3.28025100   | 3.99273600  |
| H58  | 3.15959400  | -5.82974600 | 4.94190000  | N121 | 6.43731700  | 0.55794100   | 2.30904400  |
| H59  | 4.01679800  | -5.80586800 | 3.42538000  | H122 | 6.96995200  | -0.10594300  | 1.73877300  |
| C60  | 4.20885900  | -4.05063500 | 4.58667500  | H123 | 5.72966000  | 0.07143300   | 2.87534300  |
| O61  | 3.24483500  | -3.41538400 | 4.05606700  | C124 | 11.84239800 | -5.39309000  | 7.24925500  |
| O62  | 5.17750600  | -3.50675000 | 5.20363200  | H125 | 11.25220200 | -5.97246100  | 6.55470800  |
| C63  | 9.15951200  | 0.11915800  | 11.44782300 | H126 | 12.79646300 | -5.85244900  | 7.46174200  |
| H64  | 9.83838100  | -0.15588400 | 10.63354900 | H127 | 12.01920600 | -4.39269100  | 6.84203500  |
| H65  | 9.71318200  | 0.00084300  | 12.38852400 | C128 | 11.17327500 | -5.34703700  | 8.63949500  |
| C66  | 7.93441700  | -0.79608300 | 11.47175800 | H129 | 11.86965500 | -4.88382300  | 9.35299300  |
| H67  | 7.21775300  | -0.44873600 | 12.22264900 | H130 | 11.02553800 | -6.37717000  | 8.99104400  |
| H68  | 8.22597100  | -1.81033600 | 11.77361000 | C131 | 9.87238000  | -4.62011700  | 8.71709000  |
| C69  | 7.17345300  | -0.90658600 | 10.15263500 | N132 | 9.02825700  | -4.71522300  | 9.82012400  |
| O70  | 7.64963700  | -0.31252300 | 9.13936500  | C133 | 9.26124400  | -3.73093800  | 7.87891800  |
| O71  | 6.13421300  | -1.63413300 | 10.14936500 | H134 | 9.56596800  | -3.36091000  | 6.91794400  |
| C72  | 8.76631400  | 1.59178700  | 11.32101000 | C135 | 7.95970700  | -3.92105900  | 9.65460500  |
| O73  | 7.62954200  | 1.99651200  | 11.58367100 | H136 | 7.13823700  | -3.77954400  | 10.33953500 |
| N74  | 9.77466500  | 2.42860000  | 10.97177100 | N137 | 8.09367600  | -3.31191100  | 8.48058900  |
| H75  | 10.63591700 | 2.03040400  | 10.62287600 | H138 | 7.37948500  | -2.67013200  | 8.06313800  |
| C76  | 9.56777800  | 3.85881500  | 10.76518900 | C139 | 6.09893600  | -4.23518800  | -1.22219700 |
| H77  | 10.51521700 | 4.37811900  | 10.91626700 | H140 | 5.38336300  | -4.56843400  | -1.95928700 |
| H78  | 8.83970700  | 4.20295200  | 11.50347200 | H141 | 7.10941700  | -4.13018100  | -1.58867200 |
| C79  | 9.10011300  | 4.14405500  | 9.32116100  | H142 | 5.79751300  | -3.21724800  | -0.94746200 |
| O80  | 9.90174000  | 4.43788100  | 8.44223700  | C143 | 6.01479500  | -5.10835700  | 0.04770900  |
| N81  | 7.75658300  | 4.01974900  | 9.12171300  | H144 | 6.01121300  | -6.17562800  | -0.19345900 |
| H82  | 7.17715700  | 3.64487000  | 9.86388800  | H145 | 6.88062500  | -4.89682300  | 0.68642400  |
| C83  | 7.15931600  | 4.11327500  | 7.80622200  | C146 | 4.75864200  | -4.72814700  | 0.83197700  |
| H84  | 6.39000400  | 4.89086100  | 7.77695100  | O147 | 4.72204600  | -3.54403700  | 1.27154800  |
| H85  | 7.96451900  | 4.38236400  | 7.11455600  | O148 | 3.81731300  | -5.57492400  | 0.97367000  |
| C86  | 6.50353600  | 2.80461200  | 7.34182600  | C149 | -1.82887600 | -11.98671800 | 4.24856800  |
| O87  | 5.37889200  | 2.82282500  | 6.82687200  | H150 | -2.35869300 | -12.71809500 | 3.65630100  |
| O88  | 7.23365300  | 1.74378700  | 7.53248000  | H151 | -2.32840600 | -11.78325000 | 5.18423400  |
| C89  | 11.58166200 | -0.61708300 | 3.48089900  | H152 | -0.85028300 | -12.41430000 | 4.50443200  |
| H90  | 12.44417500 | -1.21809300 | 3.72840300  | C153 | -1.65371700 | -10.65700600 | 3.48168900  |
| H91  | 11.83042700 | 0.38213700  | 3.15520800  | H154 | -2.57489600 | -10.44182500 | 2.92120500  |
| H92  | 11.11856900 | -1.09775300 | 2.60752300  | H155 | -1.54290700 | -9.83901700  | 4.20559700  |
| C93  | 10.52938400 | -0.45835400 | 4.58410300  | C156 | -0.45201200 | -10.64352100 | 2.52160200  |
| H94  | 9.87398100  | 0.37639700  | 4.30521300  | H157 | 0.47713500  | -10.58272300 | 3.10693700  |
| H95  | 10.98189400 | -0.17329100 | 5.54007400  | H158 | -0.40224000 | -11.60097100 | 1.98528200  |
| C96  | 9.65945200  | -1.70925000 | 4.75519700  | C159 | -0.49475000 | -9.53352600  | 1.45609800  |
| H97  | 10.20692200 | -2.46464300 | 5.33472200  | H160 | 0.37863600  | -9.61385800  | 0.79468200  |
| H98  | 9.43643200  | -2.16083500 | 3.78433600  | H161 | -1.37386200 | -9.70321000  | 0.82000200  |
| C99  | 8.32740400  | -1.40654100 | 5.42160000  | C162 | -0.60204000 | -8.08412500  | 1.94225000  |
| O100 | 7.30085700  | -1.87652900 | 4.84177500  | H163 | -0.85681000 | -7.44189700  | 1.09452700  |
| O101 | 8.32178600  | -0.71843800 | 6.49008700  | H164 | -1.38150300 | -7.95745100  | 2.69711900  |
| C102 | 10.81872500 | 4.22856900  | -0.81502100 | N165 | 0.67084400  | -7.52548100  | 2.52236700  |
| H103 | 11.54036400 | 3.48392200  | -0.51313100 | H166 | 0.78990800  | -6.53708700  | 2.20515800  |
| H104 | 11.20109300 | 5.23062600  | -0.68822400 | H167 | 0.68618800  | -7.49506500  | 3.56924500  |
| H105 | 10.66622500 | 4.09804400  | -1.89353600 | H168 | 1.53140900  | -7.99770800  | 2.16511600  |

|       |            |             |             |      |            |             |             |
|-------|------------|-------------|-------------|------|------------|-------------|-------------|
| C1169 | 0.87019800 | -6.77850300 | 5.58839400  | H186 | 3.47096300 | -2.61926100 | 1.70468700  |
| O170  | 1.29404100 | -1.65966100 | 4.41083400  | H187 | 0.99320400 | -4.45612300 | 6.17333400  |
| H171  | 0.34980800 | -2.20653900 | 2.86010200  | O188 | 3.21409000 | -1.48498300 | 7.68326800  |
| O172  | 4.90379500 | -1.27223300 | 3.66628400  | O189 | 1.23800300 | -5.05989700 | 1.31723400  |
| O173  | 7.16124600 | -2.10622200 | 1.75664200  | H190 | 2.24442400 | -5.11345300 | 1.28773700  |
| H174  | 7.10675500 | -2.15530000 | 2.72741100  | H191 | 0.97439000 | -5.05383000 | 0.38263700  |
| H175  | 6.31537600 | -2.52726200 | 1.47675600  | O192 | 0.34294600 | -2.47630300 | 1.91291500  |
| O176  | 1.11112000 | 0.34485300  | 6.37153500  | H193 | 0.49924000 | -3.44578000 | 1.91121600  |
| H177  | 1.05901200 | -0.31896000 | 5.63504800  | H194 | 1.88682500 | -2.07231500 | 1.76296800  |
| H178  | 0.78572800 | -0.12645700 | 7.15535200  | O195 | 3.07256300 | -8.18361100 | 1.24951200  |
| O179  | 2.91019700 | 2.94733100  | 8.44304400  | H196 | 3.46777900 | -7.30118800 | 1.03669500  |
| H180  | 3.69952400 | 3.14339600  | 8.98806500  | H197 | 3.81410200 | -8.75649800 | 1.49036900  |
| H181  | 2.32649100 | 2.46542000  | 9.05756800  | O198 | 1.04849600 | -3.50331000 | 6.40629800  |
| O182  | 5.13258500 | 2.39172800  | 10.16996900 | H199 | 1.22880000 | -2.42100800 | 5.05516300  |
| H183  | 5.19613400 | 1.56095800  | 9.65262100  | H200 | 1.88510000 | -3.37927200 | 6.88355200  |
| H184  | 5.78178700 | 2.28146800  | 10.88890700 | H201 | 9.18510000 | -5.30430800 | 10.62852500 |
| O185  | 2.86339600 | -1.84849300 | 1.94936000  |      |            |             |             |

**S<sub>4</sub><sup>0</sup> TS(O-O) between the outer oxo bridge and the inner oxyl radical, 9.1 kcal/mol on the energy diagram**

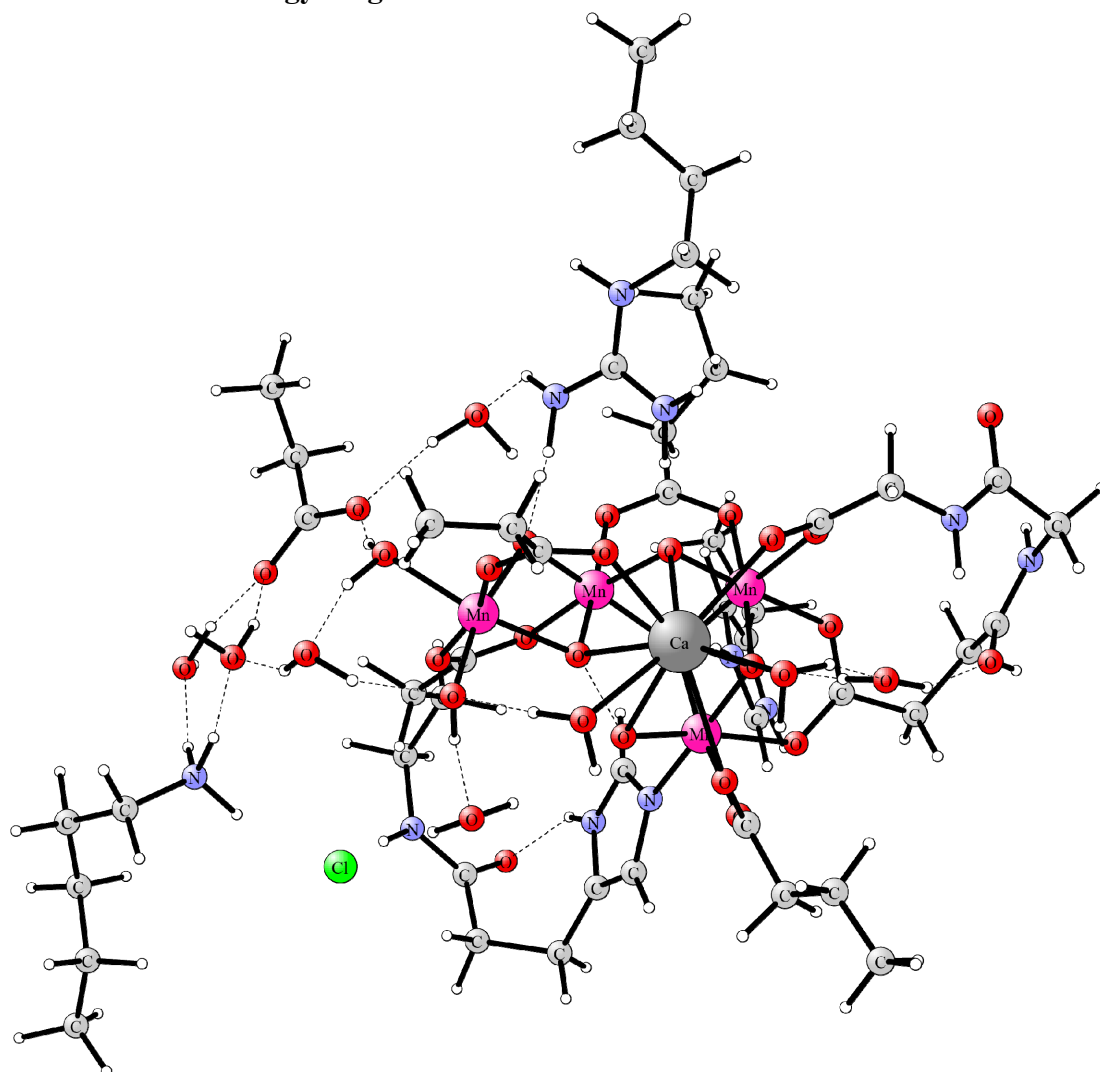

|     |             |             |             |     |            |             |             |
|-----|-------------|-------------|-------------|-----|------------|-------------|-------------|
| Mn1 | 2.93461200  | -1.43865700 | 3.96046400  | H21 | 0.37022400 | 0.36013900  | 13.58246300 |
| Mn2 | 4.60750700  | -1.51171900 | 8.63779300  | H22 | 0.73364700 | 2.12912700  | 13.86357900 |
| Mn3 | 5.40308400  | -1.51925900 | 5.43015300  | H23 | 1.94583300 | 0.90479600  | 14.04442900 |
| Mn4 | 6.62572800  | -0.00113400 | 7.42631100  | C24 | 1.46433100 | 1.25538500  | 11.97499400 |
| O5  | 3.63637800  | -1.17800200 | 5.86796900  | H25 | 2.31437900 | 1.93721400  | 11.84349500 |
| O6  | 5.83765300  | 0.21491400  | 5.84621000  | H26 | 0.64384100 | 1.64401000  | 11.36046100 |
| O7  | 5.08970100  | 0.24893200  | 8.36569000  | C27 | 1.85148200 | -0.15264500 | 11.49233000 |
| O8  | 6.01236900  | -1.80741900 | 7.37659100  | H28 | 0.95065600 | -0.78135100 | 11.42619200 |
| Ca9 | 3.40766000  | 1.23718700  | 6.85381100  | H29 | 2.51029200 | -0.63768000 | 12.22009400 |
| C10 | 0.66754600  | 1.95151000  | 1.70634700  | C30 | 2.53572100 | -0.21826700 | 10.13764600 |
| H11 | 1.22518400  | 1.90580300  | 0.78257800  | O31 | 2.25155100 | 0.55142500  | 9.20928900  |
| H12 | -0.32439000 | 2.36864100  | 1.61432400  | O32 | 3.43070100 | -1.17054200 | 10.07197700 |
| H13 | 0.47166700  | 0.89527300  | 1.93790600  | C33 | 2.78445000 | -7.86080800 | 8.62574400  |
| C14 | 1.47666500  | 2.52304900  | 2.88628700  | H34 | 2.43785100 | -8.82692300 | 9.01304700  |
| H15 | 0.80038300  | 2.93133500  | 3.64909600  | H35 | 1.96403700 | -7.42297900 | 8.04938700  |
| H16 | 2.11512900  | 3.36480300  | 2.59164300  | C36 | 4.00110700 | -8.10036800 | 7.73205700  |
| C17 | 2.38016800  | 1.55361900  | 3.68275500  | O37 | 5.12961000 | -8.31014800 | 8.22498300  |
| O18 | 3.06090300  | 2.01349300  | 4.62506100  | C38 | 3.14833600 | -6.96364000 | 9.84704300  |
| O19 | 2.35139300  | 0.31291900  | 3.34271800  | H39 | 3.83654500 | -7.52191900 | 10.49240700 |
| C20 | 1.05826000  | 1.18299700  | 13.45631400 | H40 | 2.24190600 | -6.76952900 | 10.42745600 |

|      |             |             |             |      |             |              |             |
|------|-------------|-------------|-------------|------|-------------|--------------|-------------|
| C41  | 3.78010600  | -5.65385100 | 9.46276700  | H104 | 11.20109300 | 5.23062600   | -0.68822400 |
| N42  | 4.91890300  | -5.65594200 | 8.67595400  | H105 | 10.67008800 | 4.09923600   | -1.89428100 |
| H43  | 5.38611700  | -6.52420400 | 8.39450800  | C106 | 9.48348400  | 4.00434700   | -0.08702700 |
| C44  | 3.47281900  | -4.32060600 | 9.63178100  | H107 | 9.03645600  | 3.07781300   | -0.47795400 |
| H45  | 2.67137600  | -3.85910300 | 10.18752400 | H108 | 8.77994600  | 4.81016100   | -0.33650600 |
| C46  | 5.22491800  | -4.39632000 | 8.34197300  | C109 | 9.63365700  | 3.90781500   | 1.43817700  |
| H47  | 5.96647100  | -4.12879600 | 7.61382400  | H110 | 10.08755300 | 4.83251700   | 1.81678900  |
| N48  | 4.39006700  | -3.55175200 | 8.93009300  | H111 | 10.32464300 | 3.09357900   | 1.69497700  |
| N49  | 3.80518900  | -7.94789800 | 6.41079500  | C112 | 8.32041800  | 3.70540100   | 2.20564900  |
| H50  | 2.86071000  | -7.70043600 | 6.08863000  | H113 | 7.62874800  | 4.53197800   | 1.98360600  |
| C51  | 4.91725300  | -7.84634500 | 5.46886600  | H114 | 8.52377800  | 3.71816400   | 3.28124600  |
| H52  | 4.63609200  | -8.37071400 | 4.54747200  | N115 | 7.68949100  | 2.41822800   | 1.89358200  |
| H53  | 5.77358300  | -8.35976700 | 5.90898700  | H116 | 7.75119600  | 2.08268400   | 0.94184000  |
| C54  | 5.28269900  | -6.37133100 | 5.14883800  | C117 | 6.82883900  | 1.75928600   | 2.69878700  |
| H55  | 6.14945200  | -6.36839500 | 4.47489500  | N118 | 6.42649900  | 2.31517200   | 3.85217100  |
| H56  | 5.61521700  | -5.89226100 | 6.07302500  | H119 | 5.95982900  | 1.73925300   | 4.55392000  |
| C57  | 4.12969400  | -5.55599600 | 4.53079500  | H120 | 6.38073600  | 3.31561300   | 3.97139700  |
| H58  | 3.16230900  | -5.83575700 | 4.96920500  | N121 | 6.38388200  | 0.55111400   | 2.36396900  |
| H59  | 4.02531500  | -5.76451300 | 3.45843400  | H122 | 6.89788900  | -0.14158900  | 1.80734100  |
| C60  | 4.19285100  | -4.03845700 | 4.66291800  | H123 | 5.66890300  | 0.09807800   | 2.94721600  |
| O61  | 3.20290000  | -3.40691500 | 4.18336600  | C124 | 11.84239800 | -5.39309000  | 7.24925500  |
| O62  | 5.17682000  | -3.49483300 | 5.26229600  | H125 | 11.25220200 | -5.97246100  | 6.55470800  |
| C63  | 9.15951200  | 0.11915800  | 11.44782300 | H126 | 12.79646300 | -5.85244900  | 7.46174200  |
| H64  | 9.82740400  | -0.16047800 | 10.62626900 | H127 | 12.02098400 | -4.39350500  | 6.84064400  |
| H65  | 9.72218600  | -0.00079500 | 12.38291500 | C128 | 11.17670400 | -5.34317300  | 8.64089400  |
| C66  | 7.92740100  | -0.78835000 | 11.48641500 | H129 | 11.88057000 | -4.89070200  | 9.35395300  |
| H67  | 7.22476300  | -0.44115400 | 12.25028100 | H130 | 11.01688500 | -6.37225500  | 8.99009100  |
| H68  | 8.21666900  | -1.80673500 | 11.77629200 | C131 | 9.88554800  | -4.60013900  | 8.72308200  |
| C69  | 7.15076600  | -0.88052500 | 10.17445300 | N132 | 9.03660200  | -4.69699300  | 9.82210800  |
| O70  | 7.63783500  | -0.28897300 | 9.16347200  | C133 | 9.28764000  | -3.69530200  | 7.89177300  |
| O71  | 6.09617200  | -1.58522300 | 10.17259200 | H134 | 9.60095900  | -3.31631400  | 6.93660700  |
| C72  | 8.76919700  | 1.59274700  | 11.32248200 | C135 | 7.97659100  | -3.89064900  | 9.65969500  |
| O73  | 7.63438400  | 1.99953300  | 11.59110000 | H136 | 7.15072800  | -3.75218000  | 10.34014600 |
| N74  | 9.77593300  | 2.42837900  | 10.96729700 | N137 | 8.12111800  | -3.27188300  | 8.49218800  |
| H75  | 10.63663600 | 2.03077800  | 10.61633100 | H138 | 7.40705000  | -2.62892000  | 8.07179500  |
| C76  | 9.56777800  | 3.85881500  | 10.76518900 | C139 | 6.09893600  | -4.23518800  | -1.22219700 |
| H77  | 10.51437000 | 4.37840600  | 10.92165900 | H140 | 5.38336300  | -4.56843400  | -1.95928700 |
| H78  | 8.83779900  | 4.19914300  | 11.50317700 | H141 | 7.10941700  | -4.13018100  | -1.58867200 |
| C79  | 9.10545500  | 4.14852800  | 9.32164900  | H142 | 5.79621200  | -3.21786000  | -0.94530500 |
| O80  | 9.91224400  | 4.41610900  | 8.43928700  | C143 | 6.02431800  | -5.11016500  | 0.04831500  |
| N81  | 7.75827600  | 4.05970200  | 9.12624600  | H144 | 6.02471500  | -6.17669100  | -0.19649900 |
| H82  | 7.17430600  | 3.69056100  | 9.86768600  | H145 | 6.89545300  | -4.89732100  | 0.67941100  |
| C83  | 7.16425500  | 4.15010900  | 7.80947200  | C146 | 4.77402500  | -4.74346300  | 0.85084000  |
| H84  | 6.39656000  | 4.92888800  | 7.77547100  | O147 | 4.73606000  | -3.57151400  | 1.32086600  |
| H85  | 7.97146000  | 4.41390700  | 7.11803100  | O148 | 3.83461500  | -5.59510700  | 0.97918200  |
| C86  | 6.50922700  | 2.83998500  | 7.35123700  | C149 | -1.82887600 | -11.98671800 | 4.24856800  |
| O87  | 5.38889800  | 2.85594900  | 6.82627700  | H150 | -2.35869300 | -12.71809500 | 3.65630100  |
| O88  | 7.23392600  | 1.77920700  | 7.55992000  | H151 | -2.32840600 | -11.78325000 | 5.18423400  |
| C89  | 11.58166200 | -0.61708300 | 3.48089900  | H152 | -0.85096900 | -12.41554200 | 4.50524300  |
| H90  | 12.44417500 | -1.21809300 | 3.72840300  | C153 | -1.65036700 | -10.65891700 | 3.48006000  |
| H91  | 11.83042700 | 0.38213700  | 3.15520800  | H154 | -2.57266500 | -10.43898200 | 2.92330400  |
| H92  | 11.11729700 | -1.09664200 | 2.60777300  | H155 | -1.53115800 | -9.84085700  | 4.20252300  |
| C93  | 10.53506400 | -0.46285100 | 4.59156400  | C156 | -0.45278200 | -10.65549300 | 2.51487200  |
| H94  | 9.91090400  | 0.40698000  | 4.35175300  | H157 | 0.47905900  | -10.60199900 | 3.09661300  |
| H95  | 10.99818900 | -0.23702400 | 5.55819100  | H158 | -0.41291100 | -11.61370700 | 1.97902900  |
| C96  | 9.61699800  | -1.68442700 | 4.70679100  | C159 | -0.48998100 | -9.54572100  | 1.44901600  |
| H97  | 10.13477500 | -2.50099100 | 5.22915200  | H160 | 0.38189900  | -9.63224900  | 0.78638100  |
| H98  | 9.36134400  | -2.06974000 | 3.71547100  | H161 | -1.37134700 | -9.70887500  | 0.81433300  |
| C99  | 8.30846500  | -1.37323300 | 5.41261600  | C162 | -0.58530800 | -8.09606600  | 1.93587600  |
| O100 | 7.26499300  | -1.84144000 | 4.84998100  | H163 | -0.82768100 | -7.45016100  | 1.08728000  |
| O101 | 8.33005000  | -0.69201300 | 6.48145000  | H164 | -1.36807800 | -7.96208600  | 2.68604900  |
| C102 | 10.81872500 | 4.22856900  | -0.81502100 | N165 | 0.68934800  | -7.55252900  | 2.52497400  |
| H103 | 11.54036400 | 3.48392200  | -0.51313100 | H166 | 0.81698000  | -6.56180800  | 2.21541900  |

|       |            |             |             |      |            |             |             |
|-------|------------|-------------|-------------|------|------------|-------------|-------------|
| H167  | 0.69946800 | -7.52896500 | 3.57177400  | O185 | 2.81340300 | -1.86245400 | 1.96374100  |
| H168  | 1.54683400 | -8.02911000 | 2.16821700  | H186 | 3.41887100 | -2.62738700 | 1.73430200  |
| C1169 | 0.86585500 | -6.81854300 | 5.59456900  | H187 | 0.96854100 | -4.50990300 | 6.22420500  |
| O170  | 1.20450600 | -1.66385700 | 4.54545800  | O188 | 3.27194400 | -1.56249400 | 7.52624600  |
| H171  | 0.29799000 | -2.23836700 | 2.96156600  | O189 | 1.26307400 | -5.07350400 | 1.36837400  |
| O172  | 4.80678400 | -1.20244700 | 3.82795200  | H190 | 2.26838000 | -5.13073000 | 1.31898000  |
| O173  | 7.11456600 | -2.09360400 | 1.80766200  | H191 | 0.98154800 | -5.02685800 | 0.44032300  |
| H174  | 7.07379600 | -2.16510100 | 2.77758500  | O192 | 0.27219700 | -2.53031900 | 2.02205100  |
| H175  | 6.28374900 | -2.54442200 | 1.52191000  | H193 | 0.46588800 | -3.49133400 | 2.03801500  |
| O176  | 1.11110800 | 0.40095900  | 6.43416700  | H194 | 1.84848900 | -2.10476600 | 1.78904400  |
| H177  | 1.02442000 | -0.28670300 | 5.72118100  | O195 | 3.09180900 | -8.20379900 | 1.25322800  |
| H178  | 0.80044200 | -0.03707400 | 7.24277400  | H196 | 3.48830500 | -7.32151800 | 1.04264900  |
| O179  | 2.94271000 | 3.06231100  | 8.49259900  | H197 | 3.83534700 | -8.79334700 | 1.44100900  |
| H180  | 3.73828500 | 3.22280400  | 9.04103800  | O198 | 1.01986200 | -3.56787200 | 6.49925800  |
| H181  | 2.34799700 | 2.58379700  | 9.09938700  | H199 | 1.14268900 | -2.43571800 | 5.17663500  |
| O182  | 5.15137900 | 2.41221800  | 10.17808400 | H200 | 1.88502600 | -3.44986700 | 6.92400600  |
| H183  | 5.19501100 | 1.58007200  | 9.66139200  | H201 | 9.18414400 | -5.29628400 | 10.62480800 |
| H184  | 5.81018600 | 2.29405700  | 10.88759100 |      |            |             |             |



**S<sub>4</sub><sup>0</sup> peroxide formed by the outer oxo bridge and the inner oxyl radical, -1.0 kcal/mol on the energy diagram**

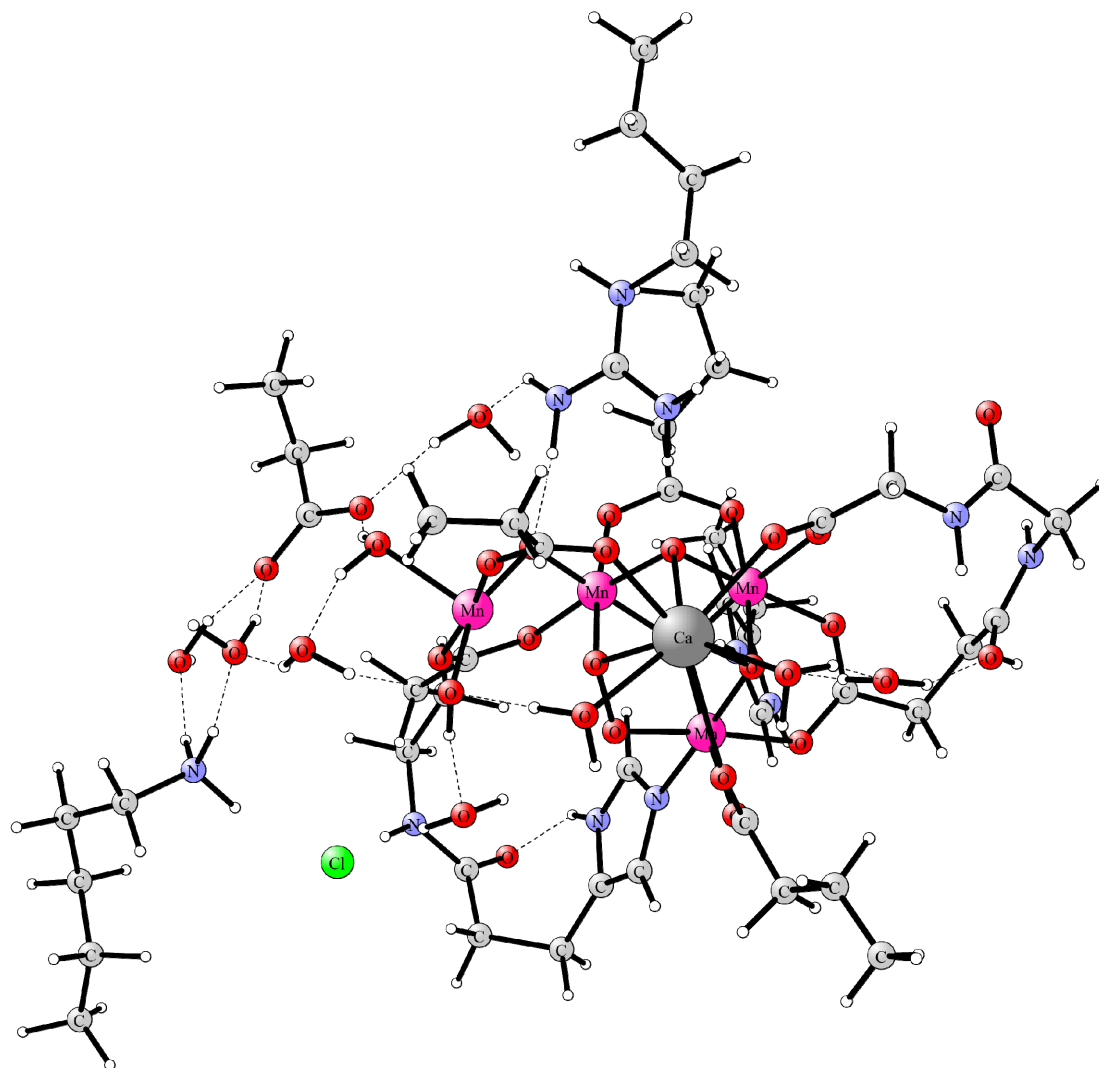

|     |             |             |             |     |            |             |             |
|-----|-------------|-------------|-------------|-----|------------|-------------|-------------|
| Mn1 | 2.81979800  | -1.45766400 | 3.84557600  | H21 | 0.37022300 | 0.36013900  | 13.58246400 |
| Mn2 | 4.65293400  | -1.57341000 | 8.74076200  | H22 | 0.73364600 | 2.12912700  | 13.86357900 |
| Mn3 | 5.36812100  | -1.55761700 | 5.51066100  | H23 | 1.94699300 | 0.90444100  | 14.04220800 |
| Mn4 | 6.60628600  | -0.01625900 | 7.47092000  | C24 | 1.46103500 | 1.24697500  | 11.96923300 |
| O5  | 3.66805600  | -1.16035000 | 6.24932700  | H25 | 2.32237000 | 1.91339700  | 11.83324300 |
| O6  | 5.81573400  | 0.19925400  | 5.91349600  | H26 | 0.64306200 | 1.64889900  | 11.35958400 |
| O7  | 5.03626300  | 0.18519300  | 8.40830500  | C27 | 1.82164400 | -0.16987700 | 11.48376500 |
| O8  | 6.06859600  | -1.83625300 | 7.46375700  | H28 | 0.90963500 | -0.78326100 | 11.42756900 |
| Ca9 | 3.39968500  | 1.31087800  | 6.86744500  | H29 | 2.47570500 | -0.66399400 | 12.20972800 |
| C10 | 0.66755700  | 1.95149800  | 1.70635000  | C30 | 2.49824400 | -0.26768000 | 10.12393800 |
| H11 | 1.22517900  | 1.90580900  | 0.78257600  | O31 | 2.24302000 | 0.49794900  | 9.18533800  |
| H12 | -0.32439000 | 2.36864500  | 1.61432600  | O32 | 3.35447400 | -1.25818700 | 10.05932100 |
| H13 | 0.48017200  | 0.89817000  | 1.95044300  | C33 | 2.78444700 | -7.86079900 | 8.62574900  |
| C14 | 1.47287000  | 2.55019000  | 2.87311900  | H34 | 2.40139500 | -8.82826400 | 8.97405900  |
| H15 | 0.79989700  | 2.98307100  | 3.62510900  | H35 | 1.98182200 | -7.37943700 | 8.05861200  |
| H16 | 2.11945500  | 3.37907500  | 2.55904600  | C36 | 3.99839400 | -8.11050300 | 7.72890500  |
| C17 | 2.35442800  | 1.56956000  | 3.66744700  | O37 | 5.12574300 | -8.33238000 | 8.22141900  |
| O18 | 3.02435500  | 2.00718700  | 4.63414800  | C38 | 3.16457900 | -7.02229100 | 9.88141100  |
| O19 | 2.32601600  | 0.34304300  | 3.30119200  | H39 | 3.84108300 | -7.61864800 | 10.50449200 |
| C20 | 1.05826200  | 1.18299600  | 13.45631100 | H40 | 2.26152900 | -6.83233800 | 10.46844700 |

|      |             |             |             |      |             |              |             |
|------|-------------|-------------|-------------|------|-------------|--------------|-------------|
| C41  | 3.82081800  | -5.71280800 | 9.54348700  | H104 | 11.20109200 | 5.23062700   | -0.68821900 |
| N42  | 4.96008500  | -5.71088500 | 8.75759300  | H105 | 10.67283700 | 4.10068500   | -1.89486000 |
| H43  | 5.41021300  | -6.58186200 | 8.45228000  | C106 | 9.48053300  | 3.99110700   | -0.09138300 |
| C44  | 3.52972700  | -4.38095800 | 9.74518600  | H107 | 9.02569300  | 3.07984700   | -0.50859900 |
| H45  | 2.73083800  | -3.92234000 | 10.30685400 | H108 | 8.78190600  | 4.80858200   | -0.31519700 |
| C46  | 5.28106800  | -4.44942800 | 8.45165300  | C109 | 9.62889000  | 3.84583000   | 1.43082700  |
| H47  | 6.02423600  | -4.17705100 | 7.72681400  | H110 | 10.09324100 | 4.75420800   | 1.83582500  |
| N48  | 4.45680500  | -3.60803500 | 9.06136000  | H111 | 10.31240200 | 3.01803800   | 1.66356100  |
| N49  | 3.80311100  | -7.95961600 | 6.40857700  | C112 | 8.31661100  | 3.63799600   | 2.20084500  |
| H50  | 2.85702300  | -7.72139800 | 6.08199000  | H113 | 7.62053400  | 4.45967600   | 1.97414500  |
| C51  | 4.91726400  | -7.84633900 | 5.46888000  | H114 | 8.52363100  | 3.66207800   | 3.27539300  |
| H52  | 4.64302500  | -8.36749100 | 4.54393300  | N115 | 7.68507700  | 2.34407700   | 1.91059000  |
| H53  | 5.77685500  | -8.35449300 | 5.90853000  | H116 | 7.73932500  | 1.99272000   | 0.96392600  |
| C54  | 5.26484900  | -6.36299800 | 5.16555700  | C117 | 6.82842300  | 1.70312200   | 2.73657400  |
| H55  | 6.14255800  | -6.33972100 | 4.50626400  | N118 | 6.44609000  | 2.28720500   | 3.88577400  |
| H56  | 5.57289100  | -5.88817800 | 6.10090500  | H119 | 5.96423400  | 1.72886700   | 4.59040300  |
| C57  | 4.10988700  | -5.55739600 | 4.53726600  | H120 | 6.37446900  | 3.29014900   | 3.96728500  |
| H58  | 3.13882100  | -5.86662600 | 4.94687400  | N121 | 6.37443500  | 0.48950800   | 2.44163100  |
| H59  | 4.03403900  | -5.74578800 | 3.45871900  | H122 | 6.86314100  | -0.21964400  | 1.88040300  |
| C60  | 4.13293600  | -4.04152100 | 4.69605700  | H123 | 5.65314900  | 0.06286300   | 3.03857100  |
| O61  | 3.14641000  | -3.41457700 | 4.22094500  | C124 | 11.84240200 | -5.39308200  | 7.24925000  |
| O62  | 5.10233500  | -3.49438500 | 5.33207900  | H125 | 11.25219900 | -5.97246100  | 6.55471100  |
| C63  | 9.15950900  | 0.11915700  | 11.44782000 | H126 | 12.79646000 | -5.85245500  | 7.46174400  |
| H64  | 9.79578600  | -0.16923100 | 10.60468800 | H127 | 12.01998900 | -4.39236300  | 6.84331700  |
| H65  | 9.75837900  | 0.00941900  | 12.36169700 | C128 | 11.19070000 | -5.34945300  | 8.64668500  |
| C66  | 7.93140900  | -0.78141100 | 11.53964500 | H129 | 11.90759200 | -4.91304600  | 9.35685900  |
| H67  | 7.24765200  | -0.42259500 | 12.31507900 | H130 | 11.02151700 | -6.37988500  | 8.98749400  |
| H68  | 8.22265200  | -1.79844300 | 11.83115200 | C131 | 9.91221100  | -4.59085500  | 8.74726300  |
| C69  | 7.13946700  | -0.87176400 | 10.24269000 | N132 | 9.07667500  | -4.68114600  | 9.85616200  |
| O70  | 7.61219500  | -0.28748300 | 9.22614500  | C133 | 9.31427900  | -3.67864200  | 7.92387200  |
| O71  | 6.07862700  | -1.57331200 | 10.26368900 | H134 | 9.62017800  | -3.30116700  | 6.96494300  |
| C72  | 8.76873800  | 1.59307900  | 11.32034600 | C135 | 8.02263000  | -3.86475500  | 9.70559300  |
| O73  | 7.63239500  | 2.00040500  | 11.58326000 | H136 | 7.20249400  | -3.72730800  | 10.39288900 |
| N74  | 9.77639700  | 2.42860800  | 10.96975800 | N137 | 8.15911200  | -3.24518600  | 8.53782500  |
| H75  | 10.64039200 | 2.03166400  | 10.62601100 | H138 | 7.43165300  | -2.60867600  | 8.11409300  |
| C76  | 9.56777600  | 3.85881200  | 10.76518700 | C139 | 6.09892200  | -4.23517900  | -1.22218800 |
| H77  | 10.51591200 | 4.37742500  | 10.91570200 | H140 | 5.38336700  | -4.56843600  | -1.95928900 |
| H78  | 8.84263000  | 4.20252000  | 11.50633900 | H141 | 7.10941900  | -4.13018700  | -1.58867400 |
| C79  | 9.09867800  | 4.14210600  | 9.32400200  | H142 | 5.79223800  | -3.22730000  | -0.91900200 |
| O80  | 9.90081600  | 4.38376100  | 8.43057600  | C143 | 6.05316900  | -5.15100400  | 0.02308300  |
| N81  | 7.74755800  | 4.07722400  | 9.14449500  | H144 | 6.06171600  | -6.20826700  | -0.25906200 |
| H82  | 7.17216300  | 3.71929000  | 9.89757300  | H145 | 6.93338700  | -4.95011100  | 0.64550500  |
| C83  | 7.14373100  | 4.15309300  | 7.83172000  | C146 | 4.81576200  | -4.82465000  | 0.85837300  |
| H84  | 6.37978100  | 4.93516300  | 7.79256600  | O147 | 4.78141800  | -3.67532500  | 1.38052400  |
| H85  | 7.94687300  | 4.40392100  | 7.13071100  | O148 | 3.87766000  | -5.68148400  | 0.96192200  |
| C86  | 6.48166100  | 2.84021000  | 7.39448000  | C149 | -1.82885500 | -11.98670600 | 4.24856200  |
| O87  | 5.36549300  | 2.86194600  | 6.85838800  | H150 | -2.35869900 | -12.71809500 | 3.65630400  |
| O88  | 7.18863100  | 1.77656000  | 7.63125000  | H151 | -2.32841400 | -11.78325300 | 5.18423400  |
| C89  | 11.58165400 | -0.61710300 | 3.48090000  | H152 | -0.85146000 | -12.41667000 | 4.50569800  |
| H90  | 12.44418200 | -1.21808400 | 3.72840400  | C153 | -1.64678100 | -10.66349600 | 3.47481900  |
| H91  | 11.83042400 | 0.38213900  | 3.15521000  | H154 | -2.57848900 | -10.42906300 | 2.93995400  |
| H92  | 11.11496900 | -1.09687800 | 2.60929400  | H155 | -1.49480200 | -9.84593000  | 4.19160400  |
| C93  | 10.53585300 | -0.46288000 | 4.60020400  | C156 | -0.47342700 | -10.68780400 | 2.48041200  |
| H94  | 9.94224400  | 0.43547200  | 4.39072900  | H157 | 0.47305600  | -10.64122100 | 3.03861200  |
| H95  | 11.00884200 | -0.28350900 | 5.57195900  | H158 | -0.46018600 | -11.65290300 | 1.95559900  |
| C96  | 9.57225900  | -1.65289800 | 4.68021400  | C159 | -0.51943500 | -9.59105600  | 1.40174500  |
| H97  | 10.06394500 | -2.51462500 | 5.15510300  | H160 | 0.33610200  | -9.69884200  | 0.72116300  |
| H98  | 9.29109700  | -1.98623000 | 3.67675000  | H161 | -1.41715200 | -9.74861500  | 0.78888200  |
| C99  | 8.27516000  | -1.35309600 | 5.41945700  | C162 | -0.58214600 | -8.13486100  | 1.87260200  |
| O100 | 7.22795000  | -1.84867300 | 4.88590200  | H163 | -0.81508300 | -7.49308000  | 1.01817000  |
| O101 | 8.31041200  | -0.66868300 | 6.48771100  | H164 | -1.35766800 | -7.97657900  | 2.62576100  |
| C102 | 10.81871500 | 4.22855200  | -0.81502400 | N165 | 0.70578100  | -7.61372800  | 2.45048700  |
| H103 | 11.54037000 | 3.48392700  | -0.51313000 | H166 | 0.83896500  | -6.61788000  | 2.15808500  |

|       |            |             |             |      |            |             |             |
|-------|------------|-------------|-------------|------|------------|-------------|-------------|
| H167  | 0.72749100 | -7.61049300 | 3.49708700  | O185 | 2.80558500 | -1.91173900 | 1.75889900  |
| H168  | 1.55322500 | -8.09110900 | 2.06927100  | H186 | 1.85573600 | -2.16601500 | 1.58444400  |
| C1169 | 0.85049400 | -6.92409600 | 5.53349900  | H187 | 3.40425200 | -2.68623800 | 1.58798000  |
| O170  | 1.10399800 | -1.65051300 | 4.48635800  | O188 | 3.39704500 | -1.87879100 | 7.41101100  |
| H171  | 1.02808900 | -2.45319400 | 5.07151600  | O189 | 1.31076300 | -5.12559800 | 1.34661500  |
| O172  | 4.69873700 | -1.15591300 | 3.97942900  | H190 | 2.31506300 | -5.19649300 | 1.30560100  |
| O173  | 7.09548000 | -2.14149500 | 1.87224100  | H191 | 1.03823500 | -5.06060700 | 0.41701000  |
| H174  | 7.05207200 | -2.21950800 | 2.84167800  | O192 | 0.22144000 | -2.59505400 | 1.93217600  |
| H175  | 6.28465800 | -2.62414800 | 1.57589700  | H193 | 0.45636400 | -3.54264500 | 2.00553500  |
| O176  | 1.13856800 | 0.36796200  | 6.43897100  | H194 | 0.25185100 | -2.24728900 | 2.85117600  |
| H177  | 1.01587400 | -0.28958200 | 5.70177300  | O195 | 3.07425100 | -8.28485300 | 1.12015500  |
| H178  | 0.79400600 | -0.07433700 | 7.23067000  | H196 | 3.48642600 | -7.40147600 | 0.94718200  |
| O179  | 2.92619400 | 3.05571500  | 8.57631800  | H197 | 3.80487300 | -8.87482100 | 1.35330800  |
| H180  | 3.71656400 | 3.18508900  | 9.14233600  | O198 | 0.90142500 | -3.65935500 | 6.37685500  |
| H181  | 2.31434500 | 2.56897500  | 9.15837100  | H199 | 1.78373200 | -3.58930000 | 6.77435000  |
| O182  | 5.10120000 | 2.34652100  | 10.23477200 | H200 | 0.82279300 | -4.59250500 | 6.07872000  |
| H183  | 5.15001500 | 1.52078500  | 9.70915700  | H201 | 9.22818600 | -5.28356400 | 10.65575900 |
| H184  | 5.80693700 | 2.25635400  | 10.90230000 |      |            |             |             |

**S<sub>4</sub><sup>0</sup> TS(O<sub>2</sub>-release), 10.0 kcal/mol on the energy diagram**

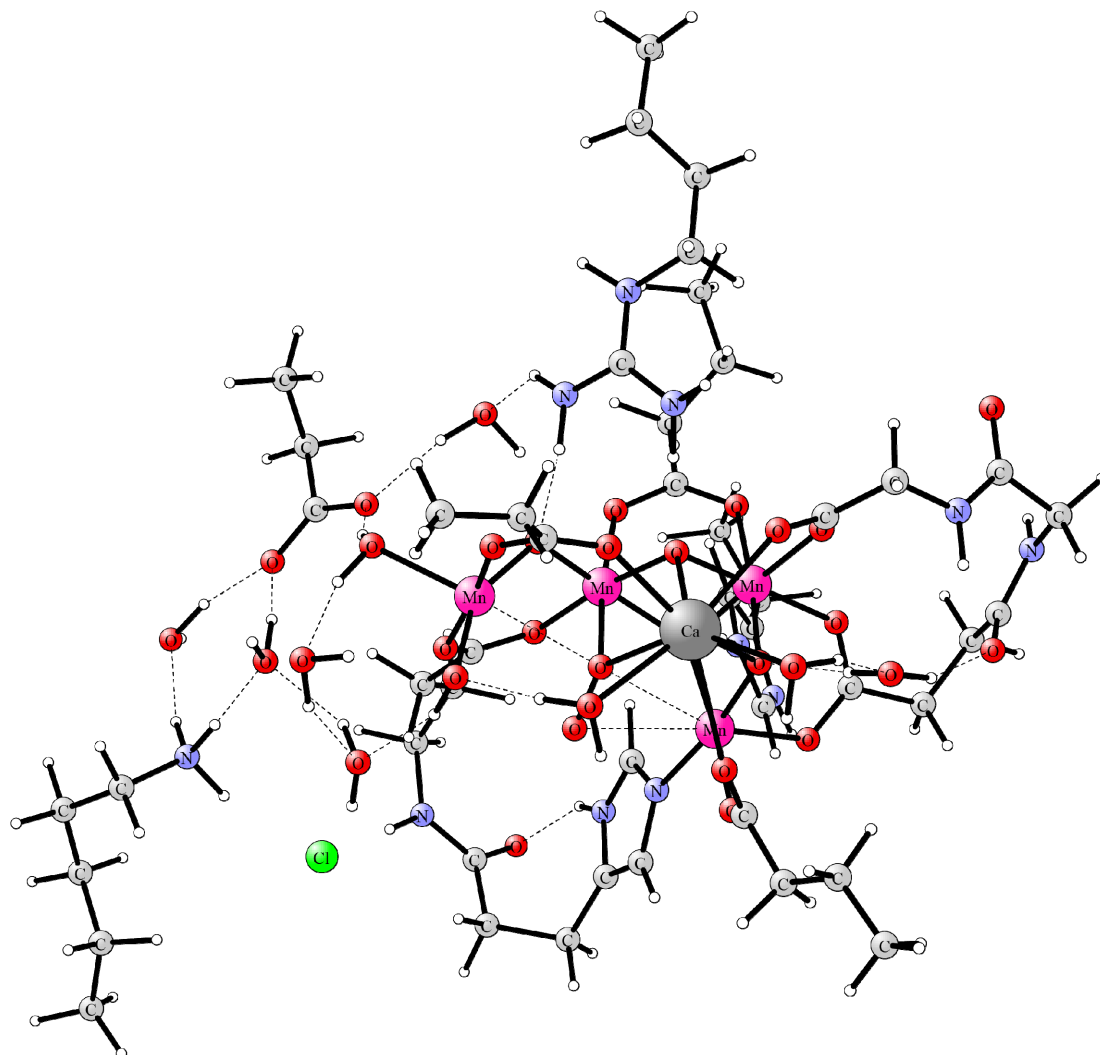

|     |             |             |             |     |            |             |             |
|-----|-------------|-------------|-------------|-----|------------|-------------|-------------|
| Mn1 | 2.84584800  | -1.46831900 | 3.69035900  | H22 | 0.73364500 | 2.12913100  | 13.86358000 |
| Mn2 | 4.63810700  | -1.58298700 | 8.85413300  | H23 | 1.95677200 | 0.90178900  | 14.02419900 |
| Mn3 | 5.33357500  | -1.59646100 | 5.52942200  | C24 | 1.42538800 | 1.26650600  | 11.96076900 |
| Mn4 | 6.52995200  | -0.03047400 | 7.52582900  | H25 | 2.32270500 | 1.88239400  | 11.81901600 |
| O5  | 3.55017000  | -1.29215400 | 6.37247300  | H26 | 0.61799700 | 1.73757200  | 11.38741800 |
| O6  | 5.65236500  | 0.16730900  | 5.98329500  | C27 | 1.67781100 | -0.15538300 | 11.42928300 |
| O7  | 5.00206200  | 0.20405100  | 8.48324100  | H28 | 0.72024000 | -0.69241900 | 11.35438400 |
| O8  | 6.00881800  | -1.85026200 | 7.48192900  | H29 | 2.28908900 | -0.72060100 | 12.14017000 |
| Ca9 | 3.39951000  | 1.33506600  | 6.89787400  | C30 | 2.35353200 | -0.26625500 | 10.07303400 |
| C10 | 0.66755700  | 1.95150000  | 1.70636100  | O31 | 2.13277500 | 0.52155000  | 9.13868100  |
| H11 | 1.22517900  | 1.90580900  | 0.78257200  | O32 | 3.15802800 | -1.28898400 | 9.98638100  |
| H12 | -0.32439200 | 2.36864200  | 1.61432400  | C33 | 2.78443800 | -7.86074700 | 8.62575000  |
| H13 | 0.47437700  | 0.89695100  | 1.94167700  | H34 | 2.40750700 | -8.83285500 | 8.96854200  |
| C14 | 1.48352200  | 2.52635700  | 2.87434300  | H35 | 1.97943000 | -7.38947300 | 8.05336900  |
| H15 | 0.82269400  | 2.92678900  | 3.65370000  | C36 | 4.00267500 | -8.09870500 | 7.73017700  |
| H16 | 2.11559600  | 3.37109200  | 2.57192700  | O37 | 5.13604200 | -8.28324900 | 8.22669800  |
| C17 | 2.38846000  | 1.52175500  | 3.60793400  | C38 | 3.14505200 | -7.01947700 | 9.88095000  |
| O18 | 3.00463800  | 1.89760000  | 4.63077800  | H39 | 3.83924400 | -7.59816400 | 10.50099300 |
| O19 | 2.43946200  | 0.33383700  | 3.12077400  | H40 | 2.23964100 | -6.85201600 | 10.47109400 |
| C20 | 1.05826700  | 1.18297700  | 13.45630700 | C41 | 3.76367200 | -5.69874100 | 9.52830700  |
| H21 | 0.37022000  | 0.36014300  | 13.58246800 | N42 | 4.90846500 | -5.68181900 | 8.74894000  |

|      |             |             |             |      |             |              |             |
|------|-------------|-------------|-------------|------|-------------|--------------|-------------|
| H43  | 5.38004700  | -6.54860900 | 8.46148000  | C106 | 9.48439700  | 3.98514800   | -0.08096000 |
| C44  | 3.42303300  | -4.37556500 | 9.68620300  | H107 | 9.02052900  | 3.08360300   | -0.50924000 |
| H45  | 2.60729700  | -3.92698200 | 10.23097100 | H108 | 8.78727400  | 4.80965100   | -0.28230500 |
| C46  | 5.18612200  | -4.42302700 | 8.40537700  | C109 | 9.64830800  | 3.81064500   | 1.43782500  |
| H47  | 5.93417600  | -4.14188200 | 7.68986100  | H110 | 10.12108100 | 4.70979600   | 1.85350500  |
| N48  | 4.32509000  | -3.59184100 | 8.98119200  | H111 | 10.33233200 | 2.97703400   | 1.64717700  |
| N49  | 3.80549600  | -7.97359100 | 6.40903200  | C112 | 8.34680200  | 3.59378900   | 2.22635100  |
| H50  | 2.84772200  | -7.82600700 | 6.05957900  | H113 | 7.64507100  | 4.41469600   | 2.01500900  |
| C51  | 4.91718800  | -7.84635300 | 5.46878900  | H114 | 8.57257800  | 3.61383200   | 3.29738600  |
| H52  | 4.65173100  | -8.38153200 | 4.54995600  | N115 | 7.71215300  | 2.29923000   | 1.94126200  |
| H53  | 5.78842300  | -8.33278600 | 5.91038200  | H116 | 7.75874800  | 1.95093800   | 0.99290900  |
| C54  | 5.23469000  | -6.36116600 | 5.15557300  | C117 | 6.84873200  | 1.66294500   | 2.76481100  |
| H55  | 6.09971200  | -6.32516500 | 4.48032700  | N118 | 6.47551900  | 2.23664800   | 3.92195200  |
| H56  | 5.55050900  | -5.87774600 | 6.08352800  | H119 | 5.97619700  | 1.68160500   | 4.61819700  |
| C57  | 4.05889800  | -5.57458100 | 4.54482500  | H120 | 6.44885200  | 3.23906600   | 4.03038900  |
| H58  | 3.10324400  | -5.87318400 | 4.99711600  | N121 | 6.37442300  | 0.45928800   | 2.45809200  |
| H59  | 3.94994700  | -5.79095500 | 3.47518400  | H122 | 6.85138300  | -0.24945200  | 1.88721000  |
| C60  | 4.10496000  | -4.05659000 | 4.66839000  | H123 | 5.65709600  | 0.03164200   | 3.06079400  |
| O61  | 3.15005200  | -3.41528100 | 4.14920000  | C124 | 11.84239000 | -5.39309100  | 7.24925300  |
| O62  | 5.06955900  | -3.52126000 | 5.32065900  | H125 | 11.25220400 | -5.97246400  | 6.55470600  |
| C63  | 9.15950700  | 0.11916400  | 11.44783400 | H126 | 12.79646600 | -5.85244700  | 7.46174200  |
| H64  | 9.76693800  | -0.16895400 | 10.58315600 | H127 | 12.02026200 | -4.39328300  | 6.84090300  |
| H65  | 9.79972900  | 0.02738400  | 12.33598800 | C128 | 11.18103600 | -5.34435300  | 8.64131600  |
| C66  | 7.95650200  | -0.78957800 | 11.59209500 | H129 | 11.88634600 | -4.89077900  | 9.35233600  |
| H67  | 7.28150900  | -0.42141900 | 12.37116800 | H130 | 11.02393900 | -6.37374900  | 8.99107600  |
| H68  | 8.26611200  | -1.79575600 | 11.90193600 | C131 | 9.88974300  | -4.60384600  | 8.72767600  |
| C69  | 7.14273500  | -0.92489100 | 10.31922100 | N132 | 9.05817200  | -4.69193100  | 9.83970700  |
| O70  | 7.56491400  | -0.33618800 | 9.27505600  | C133 | 9.27533400  | -3.71166500  | 7.89399400  |
| O71  | 6.11753900  | -1.66355900 | 10.38673900 | H134 | 9.57220100  | -3.34455800  | 6.92802000  |
| C72  | 8.76194800  | 1.59141300  | 11.32162800 | C135 | 7.99260800  | -3.89197000  | 9.68326200  |
| O73  | 7.62812000  | 1.99992100  | 11.59269400 | H136 | 7.18055100  | -3.74281500  | 10.37835400 |
| N74  | 9.76849500  | 2.42658800  | 10.96290100 | N137 | 8.11572500  | -3.28575900  | 8.50686300  |
| H75  | 10.63101600 | 2.02694300  | 10.61882000 | H138 | 7.38650400  | -2.64430700  | 8.09227000  |
| C76  | 9.56778700  | 3.85881200  | 10.76519600 | C139 | 6.09893700  | -4.23519500  | -1.22217300 |
| H77  | 10.52045300 | 4.37088400  | 10.90890300 | H140 | 5.38336300  | -4.56843300  | -1.95929000 |
| H78  | 8.85123600  | 4.20480900  | 11.51391100 | H141 | 7.10941800  | -4.13018000  | -1.58868200 |
| C79  | 9.08544400  | 4.15288200  | 9.33093200  | H142 | 5.79022200  | -3.22942600  | -0.91443900 |
| O80  | 9.87537900  | 4.42653600  | 8.43554300  | C143 | 6.06357400  | -5.15667500  | 0.01665400  |
| N81  | 7.73540200  | 4.05877400  | 9.15877200  | H144 | 6.10823100  | -6.21176800  | -0.26983000 |
| H82  | 7.17152500  | 3.68104500  | 9.91104500  | H145 | 6.92755900  | -4.93148800  | 0.65329800  |
| C83  | 7.12176900  | 4.14406800  | 7.85232000  | C146 | 4.80433200  | -4.87386700  | 0.82921800  |
| H84  | 6.35926000  | 4.92825900  | 7.82208100  | O147 | 4.72583400  | -3.72532600  | 1.35843000  |
| H85  | 7.91960900  | 4.39946900  | 7.14649700  | O148 | 3.89329100  | -5.75657300  | 0.91089100  |
| C86  | 6.45237500  | 2.83763700  | 7.40888300  | C149 | -1.82887600 | -11.98671000 | 4.24860400  |
| O87  | 5.34832100  | 2.87780600  | 6.84528100  | H150 | -2.35868500 | -12.71809000 | 3.65628700  |
| O88  | 7.13380900  | 1.76358500  | 7.66158400  | H151 | -2.32841500 | -11.78325600 | 5.18423100  |
| C89  | 11.58166100 | -0.61708500 | 3.48090800  | H152 | -0.85427500 | -12.42256200 | 4.50791000  |
| H90  | 12.44417800 | -1.21809300 | 3.72840000  | C153 | -1.63037000 | -10.68757600 | 3.44408700  |
| H91  | 11.83042700 | 0.38213800  | 3.15520500  | H154 | -2.58818000 | -10.39823000 | 2.98734400  |
| H92  | 11.11045400 | -1.09799800 | 2.61257800  | H155 | -1.35268200 | -9.87147300  | 4.12341000  |
| C93  | 10.53695300 | -0.45144800 | 4.60744900  | C156 | -0.55738500 | -10.83320300 | 2.34991700  |
| H94  | 9.96799700  | 0.46551300  | 4.41091100  | H157 | 0.43698100  | -10.82308100 | 2.81955100  |
| H95  | 11.01777900 | -0.29604000 | 5.57959200  | H158 | -0.65095800 | -11.82220400 | 1.88056000  |
| C96  | 9.53902400  | -1.61435900 | 4.67762600  | C159 | -0.62538700 | -9.79460300  | 1.21612900  |
| H97  | 10.00945600 | -2.49662800 | 5.13642300  | H160 | 0.16783100  | -9.99449400  | 0.48255600  |
| H98  | 9.24909300  | -1.92771400 | 3.67007200  | H161 | -1.57460900 | -9.92417100  | 0.67892400  |
| C99  | 8.24034800  | -1.31450700 | 5.42383800  | C162 | -0.56027700 | -8.31793900  | 1.60944500  |
| O100 | 7.20065600  | -1.83761300 | 4.89617100  | H163 | -0.72655400 | -7.69725600  | 0.72410600  |
| O101 | 8.25539000  | -0.62029600 | 6.48203800  | H164 | -1.32075000 | -8.05762000  | 2.35032300  |
| C102 | 10.81871900 | 4.22856600  | -0.81502400 | N165 | 0.75920500  | -7.89683600  | 2.18238500  |
| H103 | 11.54036700 | 3.48392300  | -0.51312900 | H166 | 0.88948100  | -6.86142400  | 2.07741300  |
| H104 | 11.20109500 | 5.23062800  | -0.68822300 | H167 | 0.82437400  | -8.06273000  | 3.21220300  |
| H105 | 10.66717300 | 4.10029700  | -1.89375300 | H168 | 1.58118300  | -8.30326100  | 1.68012800  |

|       |            |             |             |      |             |             |             |
|-------|------------|-------------|-------------|------|-------------|-------------|-------------|
| C1169 | 0.81215800 | -7.42792100 | 5.28785300  | H186 | 1.72303700  | -2.53614900 | 1.62876300  |
| O170  | 1.12191200 | -1.58468500 | 4.34677000  | H187 | 3.31002600  | -2.85996100 | 1.52290000  |
| H171  | 0.91639000 | -2.51658400 | 4.60075600  | O188 | 2.87582800  | -2.29528100 | 6.84030000  |
| O172  | 4.67853400 | -1.18358700 | 3.97169000  | O189 | 1.47802800  | -5.25462800 | 1.86463400  |
| O173  | 7.04051700 | -2.18185300 | 1.88086700  | H190 | 2.41134200  | -5.32008100 | 1.49622700  |
| H174  | 6.99650900 | -2.25019100 | 2.85106900  | H191 | 0.99474600  | -4.58941000 | 1.34686500  |
| H175  | 6.22863500 | -2.66262500 | 1.58584100  | O192 | -0.10702300 | -2.77750700 | 2.02636700  |
| O176  | 1.16525800 | 0.33588800  | 6.40499200  | H193 | -0.27317500 | -3.42717100 | 2.74568500  |
| H177  | 1.04220900 | -0.32756200 | 5.67506300  | H194 | 0.00084600  | -1.95741400 | 2.54741400  |
| H178  | 0.81968800 | -0.08942100 | 7.20539000  | O195 | 3.07592600  | -8.36977100 | 0.67223100  |
| O179  | 2.91711600 | 3.06663500  | 8.60771000  | H196 | 3.47690900  | -7.46682100 | 0.62845100  |
| H180  | 3.69897200 | 3.19385900  | 9.18721400  | H197 | 3.80464500  | -8.96168400 | 0.90813700  |
| H181  | 2.29662700 | 2.57203700  | 9.17458400  | O198 | 0.36379300  | -4.32934400 | 4.27441400  |
| O182  | 5.08874400 | 2.37472400  | 10.26364900 | H199 | 1.07511200  | -4.62418900 | 3.66775800  |
| H183  | 5.14428600 | 1.54512900  | 9.74218700  | H200 | 0.18458700  | -5.13371700 | 4.80543800  |
| H184  | 5.78700800 | 2.28643500  | 10.93903200 | H201 | 9.22079900  | -5.28126300 | 10.64673800 |
| O185  | 2.62637900 | -2.14286100 | 1.66882500  |      |             |             |             |

**S<sub>0</sub><sup>0</sup> RE(H<sup>+</sup>-transfer), 5.5 kcal/mol on the energy diagram**

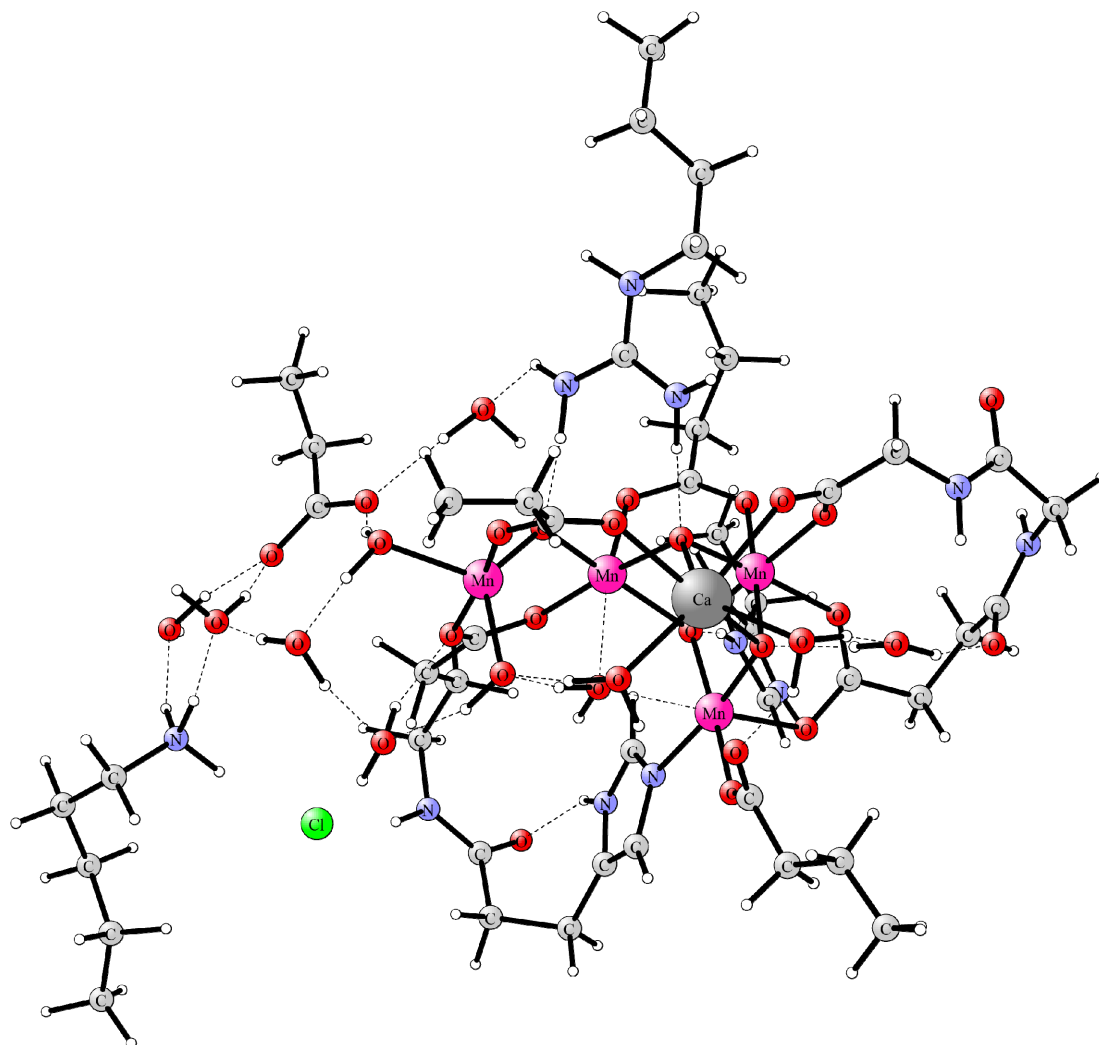

|     |             |             |             |     |            |             |             |
|-----|-------------|-------------|-------------|-----|------------|-------------|-------------|
| Mn1 | 2.97404169  | -1.39253563 | 3.62218143  | H22 | 0.73364676 | 2.12912702  | 13.86357874 |
| Mn2 | 4.61256379  | -1.44401955 | 8.70702888  | H23 | 1.96463418 | 0.90825616  | 14.01445998 |
| Mn3 | 5.46102261  | -1.56808713 | 5.48690847  | C24 | 1.41106720 | 1.29303197  | 11.96309944 |
| Mn4 | 6.61960549  | 0.03953125  | 7.48182343  | H25 | 2.28094006 | 1.94808885  | 11.82331216 |
| O5  | 3.33693907  | -1.78255509 | 6.70259656  | H26 | 0.58532345 | 1.74092496  | 11.39735522 |
| O6  | 5.73865162  | 0.24135485  | 5.93800966  | C27 | 1.71756721 | -0.10602465 | 11.41156163 |
| O7  | 5.05245124  | 0.32785414  | 8.40485107  | H28 | 0.78599011 | -0.68837592 | 11.33746646 |
| O8  | 6.07222787  | -1.77707993 | 7.44775387  | H29 | 2.36562578 | -0.65820941 | 12.10152047 |
| Ca9 | 3.69874121  | 1.57944144  | 6.75115667  | C30 | 2.37661618 | -0.14364020 | 10.04488502 |
| C10 | 0.66754610  | 1.95150824  | 1.70634800  | O31 | 2.17266557 | 0.72332359  | 9.17882616  |
| H11 | 1.22518343  | 1.90580284  | 0.78257762  | O32 | 3.14311058 | -1.18280059 | 9.87343279  |
| H12 | -0.32438961 | 2.36864195  | 1.61432411  | C33 | 2.78445007 | -7.86080811 | 8.62574398  |
| H13 | 0.52917320  | 0.91223570  | 2.02470326  | H34 | 2.52870366 | -8.82386683 | 9.08394906  |
| C14 | 1.51415928  | 2.56551959  | 2.83863984  | H35 | 1.92980060 | -7.55620700 | 8.01351744  |
| H15 | 0.87573386  | 2.93296713  | 3.65319870  | C36 | 4.01466069 | -8.06002047 | 7.74535403  |
| H16 | 2.10751751  | 3.43139951  | 2.51842647  | O37 | 5.14713516 | -8.21841758 | 8.24645949  |
| C17 | 2.48575809  | 1.58315840  | 3.52524950  | C38 | 3.05976753 | -6.89197872 | 9.81368999  |
| O18 | 3.18798469  | 1.98450216  | 4.47512708  | H39 | 3.72332244 | -7.40741922 | 10.51839824 |
| O19 | 2.48585735  | 0.37291188  | 3.07231920  | H40 | 2.12076802 | -6.69791177 | 10.33964091 |
| C20 | 1.05825996  | 1.18299629  | 13.45631309 | C41 | 3.68534681 | -5.59060541 | 9.41139514  |
| H21 | 0.37022395  | 0.36013904  | 13.58246292 | N42 | 4.88178829 | -5.59855358 | 8.71395453  |

|      |             |             |             |      |             |              |             |
|------|-------------|-------------|-------------|------|-------------|--------------|-------------|
| H43  | 5.37462580  | -6.47008676 | 8.48377766  | C106 | 9.49096266  | 3.99672762   | -0.07283026 |
| C44  | 3.32859259  | -4.26573611 | 9.48895391  | H107 | 9.02604433  | 3.08715013   | -0.48288462 |
| H45  | 2.48248609  | -3.80003506 | 9.97023448  | H108 | 8.79056569  | 4.81759733   | -0.27955866 |
| C46  | 5.17677019  | -4.35121284 | 8.34054112  | C109 | 9.67863418  | 3.84592491   | 1.44518315  |
| H47  | 5.97861488  | -4.09486491 | 7.67655471  | H110 | 10.14574525 | 4.75565060   | 1.84478969  |
| N48  | 4.26984779  | -3.50195434 | 8.81264093  | H111 | 10.37413336 | 3.02129346   | 1.65299654  |
| N49  | 3.81750955  | -7.94046151 | 6.42219017  | C112 | 8.38809748  | 3.61549703   | 2.24313682  |
| H50  | 2.87047846  | -7.81034544 | 6.05915804  | H113 | 7.69307548  | 4.45366730   | 2.08105285  |
| C51  | 4.91725307  | -7.84634434 | 5.46886579  | H114 | 8.62755088  | 3.58095840   | 3.31085926  |
| H52  | 4.59815318  | -8.35177396 | 4.55110937  | N115 | 7.73978539  | 2.34517849   | 1.90016107  |
| H53  | 5.77949649  | -8.38378247 | 5.87007141  | H116 | 7.73437604  | 2.06711950   | 0.92805994  |
| C54  | 5.29302212  | -6.37805544 | 5.13680754  | C117 | 6.92026401  | 1.65064818   | 2.72023636  |
| H55  | 6.18158801  | -6.38803185 | 4.49213306  | N118 | 6.60473901  | 2.13893721   | 3.92739625  |
| H56  | 5.59442352  | -5.87753969 | 6.06071588  | H119 | 6.17553918  | 1.52131845   | 4.62496234  |
| C57  | 4.16080446  | -5.57842365 | 4.45861481  | H120 | 6.57804567  | 3.12954667   | 4.11590028  |
| H58  | 3.18149124  | -5.86482043 | 4.86242144  | N121 | 6.42686554  | 0.47076946   | 2.35051065  |
| H59  | 4.08982059  | -5.80905790 | 3.38751691  | H122 | 6.90030437  | -0.20911022  | 1.74900945  |
| C60  | 4.23417626  | -4.06165263 | 4.56990271  | H123 | 5.72251473  | 0.01704129   | 2.95464901  |
| O61  | 3.25944155  | -3.40165004 | 4.07939687  | C124 | 11.84239763 | -5.39308953  | 7.24925489  |
| O62  | 5.21183115  | -3.53170128 | 5.18739705  | H125 | 11.25220231 | -5.97246126  | 6.55470795  |
| C63  | 9.15951156  | 0.11915813  | 11.44782285 | H126 | 12.79646291 | -5.85244915  | 7.46174208  |
| H64  | 9.77555945  | -0.15932138 | 10.58699873 | H127 | 12.01595349 | -4.39184023  | 6.84352773  |
| H65  | 9.77706204  | -0.00687676 | 12.34765105 | C128 | 11.17279016 | -5.35812088  | 8.64200963  |
| C66  | 7.93555792  | -0.77159979 | 11.57357678 | H129 | 11.87433891 | -4.90898247  | 9.35984858  |
| H67  | 7.26930917  | -0.39589013 | 12.35702713 | H130 | 11.01817049 | -6.39176474  | 8.98201043  |
| H68  | 8.22520524  | -1.78650288 | 11.87514998 | C131 | 9.88108668  | -4.61479810  | 8.73312815  |
| C69  | 7.12125888  | -0.86981000 | 10.29378263 | N132 | 9.12606305  | -4.56795438  | 9.90183973  |
| O70  | 7.56381430  | -0.24320507 | 9.27958157  | C133 | 9.20975692  | -3.82021550  | 7.84741588  |
| O71  | 6.09470635  | -1.60752193 | 10.32220011 | H134 | 9.42813279  | -3.59253448  | 6.82031483  |
| C72  | 8.77160544  | 1.59719531  | 11.35317159 | C135 | 8.05738261  | -3.77348200  | 9.73002528  |
| O73  | 7.64979880  | 2.00592193  | 11.66927962 | H136 | 7.28804836  | -3.53905762  | 10.45101175 |
| N74  | 9.77378964  | 2.42930882  | 10.97273026 | N137 | 8.10391016  | -3.30128363  | 8.48893154  |
| H75  | 10.61557104 | 2.02695095  | 10.58188029 | H138 | 7.38420446  | -2.64274226  | 8.07142854  |
| C76  | 9.56777761  | 3.85881471  | 10.76518874 | C139 | 6.09893605  | -4.23518876  | -1.22219710 |
| H77  | 10.48457095 | 4.39273743  | 11.02489079 | H140 | 5.38336325  | -4.56843395  | -1.95928725 |
| H78  | 8.76293235  | 4.17139651  | 11.43242070 | H141 | 7.10941696  | -4.13018081  | -1.58867205 |
| C79  | 9.25768342  | 4.12981458  | 9.28466163  | H142 | 5.80028579  | -3.20631645  | -0.97668744 |
| O80  | 10.15786530 | 4.24498897  | 8.46057146  | C143 | 6.02581086  | -5.11220116  | 0.04398744  |
| N81  | 7.92978764  | 4.19282156  | 8.98324767  | H144 | 6.12085065  | -6.17406425  | -0.20518216 |
| H82  | 7.25047867  | 3.89412479  | 9.67545951  | H145 | 6.84199754  | -4.83338074  | 0.72028962  |
| C83  | 7.46795716  | 4.22254407  | 7.61249868  | C146 | 4.70088389  | -4.84224671  | 0.75595162  |
| H84  | 6.80688348  | 5.07641092  | 7.43479175  | O147 | 4.56928824  | -3.69838035  | 1.27556664  |
| H85  | 8.35688119  | 4.31749391  | 6.97921428  | O148 | 3.79211884  | -5.74000476  | 0.75107361  |
| C86  | 6.69881856  | 2.95112046  | 7.23484821  | C149 | -1.82887465 | -11.98671726 | 4.24856859  |
| O87  | 5.62158388  | 3.05816737  | 6.62112071  | H150 | -2.35869354 | -12.71809503 | 3.65630028  |
| O88  | 7.26013624  | 1.84631508  | 7.59881973  | H151 | -2.32840671 | -11.78325026 | 5.18423368  |
| C89  | 11.58166190 | -0.61708344 | 3.48089927  | H152 | -0.85965051 | -12.42982056 | 4.51601170  |
| H90  | 12.44417524 | -1.21809272 | 3.72840284  | C153 | -1.62030853 | -10.69347723 | 3.43429020  |
| H91  | 11.83042704 | 0.38213700  | 3.15520804  | H154 | -2.58036513 | -10.40209956 | 2.98254583  |
| H92  | 11.07378253 | -1.11489469 | 2.64466918  | H155 | -1.33047181 | -9.87092867  | 4.09936132  |
| C93  | 10.58146972 | -0.36941240 | 4.61657110  | C156 | -0.55575445 | -10.86504595 | 2.33258362  |
| H94  | 9.80128228  | 0.29165092  | 4.21651097  | H157 | 0.44311808  | -10.73144110 | 2.77151804  |
| H95  | 11.04987436 | 0.18978858  | 5.43459620  | H158 | -0.58072887 | -11.89896422 | 1.96198268  |
| C96  | 9.91555915  | -1.63822866 | 5.17619171  | C159 | -0.72557142 | -9.95931791  | 1.10033985  |
| H97  | 10.50782378 | -2.00933004 | 6.02062211  | H160 | 0.04275610  | -10.20305076 | 0.35253529  |
| H98  | 9.86581449  | -2.41965447 | 4.41075441  | H161 | -1.68986302 | -10.19113931 | 0.62728186  |
| C99  | 8.49262781  | -1.33919582 | 5.62701578  | C162 | -0.71779177 | -8.44707857  | 1.32826168  |
| O100 | 7.55190913  | -1.86928865 | 4.97670728  | H163 | -0.98557864 | -7.93722353  | 0.39790191  |
| O101 | 8.36113672  | -0.55173729 | 6.62900836  | H164 | -1.43848292 | -8.14563232  | 2.09342295  |
| C102 | 10.81872437 | 4.22856835  | -0.81502146 | N165 | 0.61269000  | -7.89536634  | 1.75112751  |
| H103 | 11.54036435 | 3.48392235  | -0.51313097 | H166 | 0.70421766  | -6.90478980  | 1.43570049  |
| H104 | 11.20109296 | 5.23062594  | -0.68822340 | H167 | 0.73176499  | -7.87437423  | 2.79042939  |
| H105 | 10.67344020 | 4.10334260  | -1.89518561 | H168 | 1.44105531  | -8.35588923  | 1.31120152  |



|       |            |             |             |      |            |             |             |
|-------|------------|-------------|-------------|------|------------|-------------|-------------|
| C1169 | 0.86393947 | -7.22277414 | 4.79048355  | H187 | 0.31137630 | -4.91646772 | 4.64130200  |
| O170  | 1.52811316 | -1.41218730 | 5.02646831  | O188 | 1.18634101 | -5.38500641 | 0.63569596  |
| H171  | 0.01807778 | -3.39778463 | 2.73759090  | H189 | 2.18787736 | -5.38422289 | 0.78075794  |
| O172  | 4.74188750 | -1.08988645 | 3.89560096  | H190 | 1.08466436 | -5.38381272 | -0.32978185 |
| O173  | 7.00062407 | -2.19324932 | 1.76040168  | O191 | 0.08161722 | -3.12367360 | 1.79354565  |
| H174  | 7.09392966 | -2.27880936 | 2.72497678  | H192 | 0.31037330 | -3.95795759 | 1.32866013  |
| H175  | 6.13856064 | -2.62866480 | 1.56211843  | H193 | 1.54671243 | -2.43582249 | 1.67480829  |
| O176  | 1.40810224 | 0.79291520  | 6.53175909  | O194 | 3.03994687 | -8.36716363 | 0.44613040  |
| H177  | 1.12698918 | 0.52519343  | 7.42469651  | H195 | 3.44895127 | -7.46636346 | 0.46922875  |
| H178  | 1.20489895 | 0.03496460  | 5.91947885  | H196 | 3.74569837 | -8.97632745 | 0.70785718  |
| O179  | 3.14600045 | 3.18380470  | 8.53414637  | O197 | 0.54367869 | -3.99742791 | 4.38608000  |
| H180  | 3.90928632 | 3.31428681  | 9.13897044  | H198 | 1.49437544 | -4.05890805 | 4.16412536  |
| H181  | 2.52407082 | 2.65000757  | 9.06667529  | H199 | 0.92593797 | -2.18577743 | 4.98872669  |
| O182  | 5.35307014 | 2.58262018  | 10.10209252 | H200 | 3.30714938 | -2.73514587 | 6.89473952  |
| H183  | 5.36085130 | 1.72594275  | 9.62202547  | H201 | 2.48187486 | -1.62475138 | 6.07881194  |
| H184  | 5.97211283 | 2.45087141  | 10.84646453 | H202 | 9.34233932 | -5.06109644 | 10.75914823 |
| O185  | 2.49071433 | -2.07616403 | 1.72365566  |      |            |             |             |
| H186  | 3.13687171 | -2.80458040 | 1.50464847  |      |            |             |             |

**S<sub>0</sub><sup>0</sup> TS(H<sup>+</sup>-transfer), 4.0 kcal/mol on the energy diagram**

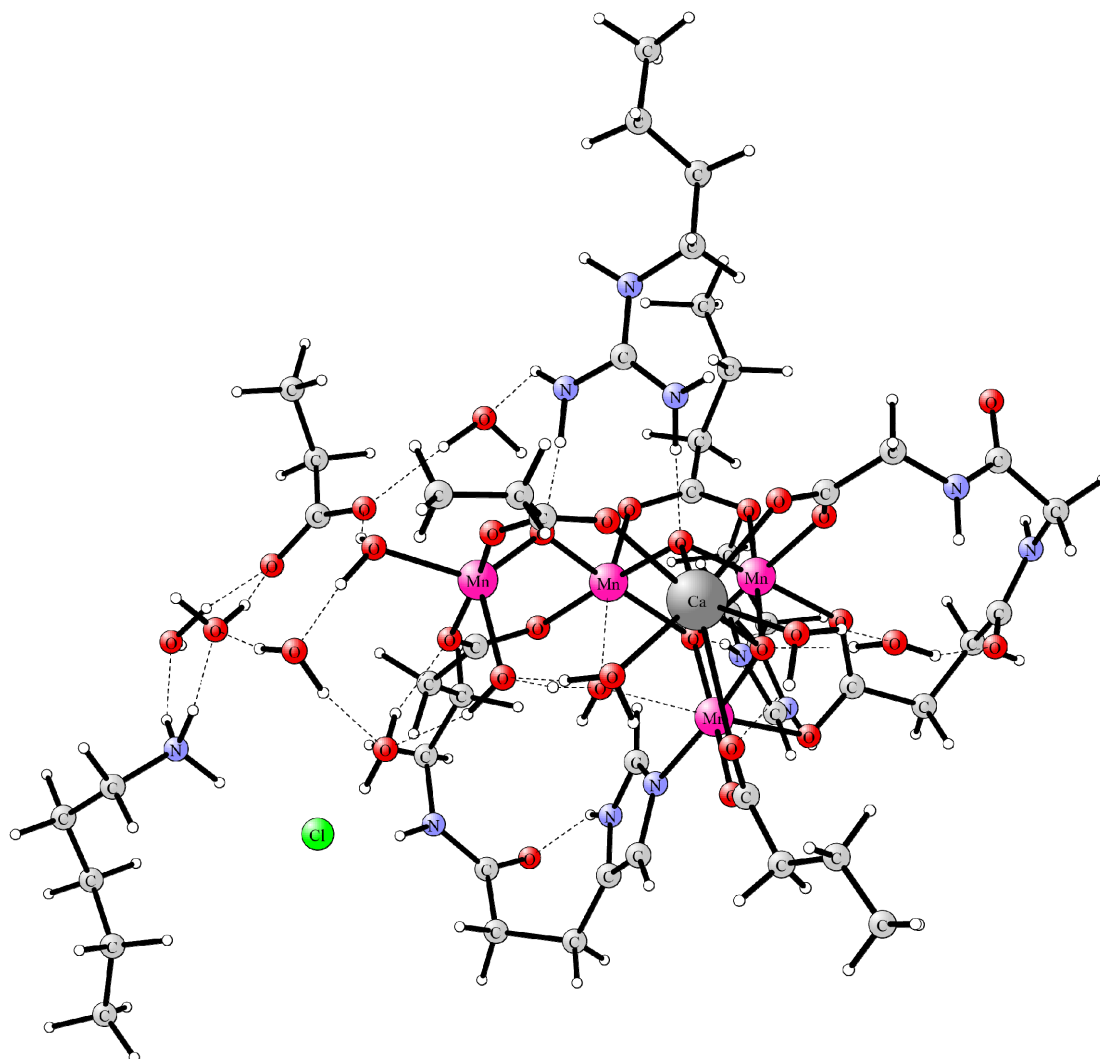

|     |             |             |             |     |            |             |             |
|-----|-------------|-------------|-------------|-----|------------|-------------|-------------|
| Mn1 | 2.99442546  | -1.41364879 | 3.58183833  | H22 | 0.73364676 | 2.12912702  | 13.86357874 |
| Mn2 | 4.59385503  | -1.42472656 | 8.69549697  | H23 | 1.96463418 | 0.90825616  | 14.01445998 |
| Mn3 | 5.42698033  | -1.55188765 | 5.53048455  | C24 | 1.40821205 | 1.31140267  | 11.96100443 |
| Mn4 | 6.62633379  | 0.04885775  | 7.49243403  | H25 | 2.30943591 | 1.92552820  | 11.83491164 |
| O5  | 3.37477272  | -1.68601012 | 6.69242033  | H26 | 0.60433495 | 1.82032087  | 11.41569863 |
| O6  | 5.73660651  | 0.25411931  | 5.95321946  | C27 | 1.63731400 | -0.08350902 | 11.35763893 |
| O7  | 5.06588986  | 0.34327004  | 8.42389894  | H28 | 0.67002545 | -0.59065642 | 11.22235898 |
| O8  | 6.07544546  | -1.76765476 | 7.45754581  | H29 | 2.21775647 | -0.70748778 | 12.04543680 |
| Ca9 | 3.66635416  | 1.53636108  | 6.78830509  | C30 | 2.35080146 | -0.10878120 | 10.01565923 |
| C10 | 0.66754609  | 1.95150825  | 1.70634799  | O31 | 2.17689315 | 0.76566457  | 9.14717579  |
| H11 | 1.22518343  | 1.90580284  | 0.78257762  | O32 | 3.12872435 | -1.14019858 | 9.86884286  |
| H12 | -0.32438961 | 2.36864195  | 1.61432411  | C33 | 2.78445007 | -7.86080811 | 8.62574398  |
| H13 | 0.52917320  | 0.91223570  | 2.02470326  | H34 | 2.52870366 | -8.82386683 | 9.08394906  |
| C14 | 1.51503860  | 2.55605766  | 2.84473623  | H35 | 1.92980060 | -7.55620700 | 8.01351744  |
| H15 | 0.87536708  | 2.92836570  | 3.65609724  | C36 | 4.01659788 | -8.05578810 | 7.74665300  |
| H16 | 2.12009199  | 3.41575623  | 2.53027450  | O37 | 5.14968715 | -8.20605703 | 8.24821376  |
| C17 | 2.47291142  | 1.56132763  | 3.53586801  | C38 | 3.05440347 | -6.88723168 | 9.81157746  |
| O18 | 3.18019210  | 1.95223370  | 4.48475280  | H39 | 3.72353580 | -7.39613903 | 10.51583249 |
| O19 | 2.44854234  | 0.34722199  | 3.08636538  | H40 | 2.11474673 | -6.70057121 | 10.33912200 |
| C20 | 1.05825996  | 1.18299629  | 13.45631310 | C41 | 3.66881609 | -5.58033357 | 9.40727378  |
| H21 | 0.37022395  | 0.36013904  | 13.58246292 | N42 | 4.86256121 | -5.58098083 | 8.70526353  |

|      |             |             |             |      |             |              |             |
|------|-------------|-------------|-------------|------|-------------|--------------|-------------|
| H43  | 5.36243456  | -6.44798990 | 8.47601196  | C106 | 9.49299335  | 3.99800409   | -0.06804836 |
| C44  | 3.30758709  | -4.25647252 | 9.49004056  | H107 | 9.02603069  | 3.08753103   | -0.47384667 |
| H45  | 2.46056698  | -3.79623662 | 9.97528630  | H108 | 8.79189405  | 4.81852382   | -0.27364951 |
| C46  | 5.15163829  | -4.33083064 | 8.33605559  | C109 | 9.68832308  | 3.85169807   | 1.44989428  |
| H47  | 5.95144419  | -4.06873711 | 7.67203764  | H110 | 10.16121933 | 4.76123575   | 1.84296243  |
| N48  | 4.24398369  | -3.48631719 | 8.81407801  | H111 | 10.38243231 | 3.02570511   | 1.65694252  |
| N49  | 3.81867118  | -7.94191081 | 6.42286826  | C112 | 8.40275545  | 3.62963652   | 2.25840793  |
| H50  | 2.87132541  | -7.81551735 | 6.05956327  | H113 | 7.70790975  | 4.46746443   | 2.09341431  |
| C51  | 4.91725307  | -7.84634434 | 5.46886579  | H114 | 8.64925252  | 3.60375543   | 3.32491329  |
| H52  | 4.59815318  | -8.35177396 | 4.55110937  | N115 | 7.75067347  | 2.35739470   | 1.92955255  |
| H53  | 5.77949649  | -8.38378247 | 5.87007141  | H116 | 7.75468807  | 2.06341524   | 0.96216409  |
| C54  | 5.29593777  | -6.37815557 | 5.13864724  | C117 | 6.91460199  | 1.68391513   | 2.75036968  |
| H55  | 6.18515630  | -6.38917257 | 4.49475819  | N118 | 6.59110216  | 2.19176179   | 3.94690507  |
| H56  | 5.59646410  | -5.87833759 | 6.06326432  | H119 | 6.14544014  | 1.58917885   | 4.64606450  |
| C57  | 4.16619895  | -5.57687794 | 4.45940611  | H120 | 6.58302080  | 3.18449255   | 4.12464748  |
| H58  | 3.18732062  | -5.86111904 | 4.86617008  | N121 | 6.41070318  | 0.50528502   | 2.39029576  |
| H59  | 4.09249772  | -5.81085382 | 3.38931758  | H122 | 6.87806260  | -0.18699373  | 1.79683070  |
| C60  | 4.23984921  | -4.06008981 | 4.56828784  | H123 | 5.70232083  | 0.06427177   | 2.99719902  |
| O61  | 3.27462560  | -3.40409128 | 4.04701743  | C124 | 11.84239763 | -5.39308953  | 7.24925489  |
| O62  | 5.19916088  | -3.52572006 | 5.20358632  | H125 | 11.25220231 | -5.97246126  | 6.55470795  |
| C63  | 9.15951156  | 0.11915813  | 11.44782285 | H126 | 12.79646291 | -5.85244915  | 7.46174208  |
| H64  | 9.77555945  | -0.15932138 | 10.58699873 | H127 | 12.01595349 | -4.39184023  | 6.84352773  |
| H65  | 9.77706204  | -0.00687676 | 12.34765105 | C128 | 11.16835764 | -5.35828343  | 8.63997053  |
| C66  | 7.93513241  | -0.77179825 | 11.57380250 | H129 | 11.86678041 | -4.90965565  | 9.36123667  |
| H67  | 7.26967476  | -0.39679970 | 12.35816717 | H130 | 11.01289840 | -6.39229384  | 8.97870414  |
| H68  | 8.22536665  | -1.78700836 | 11.87409300 | C131 | 9.87520997  | -4.61597789  | 8.72793375  |
| C69  | 7.11995013  | -0.86845105 | 10.29371297 | N132 | 9.11994681  | -4.56801664  | 9.89665939  |
| O70  | 7.57255528  | -0.24609061 | 9.27976158  | C133 | 9.20317627  | -3.82243455  | 7.84157237  |
| O71  | 6.08903020  | -1.59817980 | 10.32056379 | H134 | 9.42161892  | -3.59400728  | 6.81450702  |
| C72  | 8.77119732  | 1.59709594  | 11.35299747 | C135 | 8.05087913  | -3.77407638  | 9.72392884  |
| O73  | 7.64979452  | 2.00572065  | 11.66961333 | H136 | 7.28177238  | -3.53824460  | 10.44484977 |
| N74  | 9.77338254  | 2.42933046  | 10.97139418 | N137 | 8.09680461  | -3.30379134  | 8.48243458  |
| H75  | 10.61392771 | 2.02641913  | 10.57853557 | H138 | 7.37844840  | -2.64116456  | 8.06736453  |
| C76  | 9.56777761  | 3.85881471  | 10.76518874 | C139 | 6.09893605  | -4.23518876  | -1.22219710 |
| H77  | 10.48457095 | 4.39273743  | 11.02489079 | H140 | 5.38336325  | -4.56843395  | -1.95928725 |
| H78  | 8.76293235  | 4.17139651  | 11.43242070 | H141 | 7.10941696  | -4.13018081  | -1.58867205 |
| C79  | 9.24858892  | 4.13459504  | 9.28657677  | H142 | 5.80028579  | -3.20631645  | -0.97668744 |
| O80  | 10.14240941 | 4.25868866  | 8.45695217  | C143 | 6.00795425  | -5.09625166  | 0.05344777  |
| N81  | 7.91792973  | 4.19338727  | 8.99539710  | H144 | 6.10457367  | -6.16221149  | -0.17668730 |
| H82  | 7.24537922  | 3.88600923  | 9.69058932  | H145 | 6.81345717  | -4.80821618  | 0.73883771  |
| C83  | 7.44262984  | 4.22692819  | 7.62894713  | C146 | 4.67072122  | -4.81385320  | 0.74048039  |
| H84  | 6.77341294  | 5.07671822  | 7.46269879  | O147 | 4.52553735  | -3.65944557  | 1.23429232  |
| H85  | 8.32450231  | 4.33147102  | 6.98754006  | O148 | 3.76586672  | -5.71526302  | 0.74306901  |
| C86  | 6.67991091  | 2.95021431  | 7.25382491  | C149 | -1.82887465 | -11.98671726 | 4.24856859  |
| O87  | 5.59176545  | 3.04574557  | 6.65924496  | H150 | -2.35869354 | -12.71809503 | 3.65630028  |
| O88  | 7.26414291  | 1.85129594  | 7.60166987  | H151 | -2.32840671 | -11.78325026 | 5.18423368  |
| C89  | 11.58166190 | -0.61708344 | 3.48089927  | H152 | -0.85965051 | -12.42982056 | 4.51601170  |
| H90  | 12.44417524 | -1.21809272 | 3.72840284  | C153 | -1.61937344 | -10.69613511 | 3.43052593  |
| H91  | 11.83042704 | 0.38213700  | 3.15520804  | H154 | -2.57823833 | -10.40595105 | 2.97587772  |
| H92  | 11.07378253 | -1.11489469 | 2.64466918  | H155 | -1.33042586 | -9.87111084  | 4.09292235  |
| C93  | 10.57674722 | -0.37135102 | 4.61373988  | C156 | -0.55220676 | -10.87153553 | 2.33134599  |
| H94  | 9.80769374  | 0.30444019  | 4.21665068  | H157 | 0.44575087  | -10.73816422 | 2.77228806  |
| H95  | 11.04527625 | 0.17089726  | 5.44296997  | H158 | -0.57772441 | -11.90662966 | 1.96426936  |
| C96  | 9.89000549  | -1.63898927 | 5.14818101  | C159 | -0.71870972 | -9.96803142  | 1.09695414  |
| H97  | 10.48049854 | -2.03952816 | 5.98044692  | H160 | 0.05078319  | -10.21330759 | 0.35111355  |
| H98  | 9.82428486  | -2.40289101 | 4.36655998  | H161 | -1.68201112 | -10.19995906 | 6.22239818  |
| C99  | 8.47267367  | -1.33217867 | 5.61486192  | C162 | -0.71141791 | -8.45549113  | 1.32277055  |
| O100 | 7.52219125  | -1.85661822 | 4.97514873  | H163 | -0.97695384 | -7.94700654  | 0.39100131  |
| O101 | 8.35793771  | -0.54771016 | 6.62204402  | H164 | -1.43308149 | -8.15273843  | 2.08640541  |
| C102 | 10.81872437 | 4.22856835  | -0.81502146 | N165 | 0.61785218  | -7.90341526  | 1.74734040  |
| H103 | 11.54036435 | 3.48392235  | -0.51313097 | H166 | 0.70006011  | -6.90707604  | 1.44761362  |
| H104 | 11.20109296 | 5.23062594  | -0.68822340 | H167 | 0.74416357  | -7.89948291  | 2.78561533  |
| H105 | 10.67344020 | 4.10334260  | -1.89518561 | H168 | 1.44579205  | -8.35141004  | 1.29372365  |

|       |             |             |             |      |            |             |             |
|-------|-------------|-------------|-------------|------|------------|-------------|-------------|
| C1169 | 0.87880431  | -7.25213976 | 4.79302910  | H187 | 0.36549542 | -4.94259923 | 4.74220856  |
| O170  | 1.56782080  | -1.43047668 | 5.13281221  | O188 | 1.15915565 | -5.36137400 | 0.67293768  |
| H171  | -0.00569028 | -3.42944883 | 2.85527497  | H189 | 2.16357335 | -5.36385307 | 0.79949975  |
| O172  | 4.72260305  | -1.06856083 | 3.92168647  | H190 | 1.03841421 | -5.33533981 | -0.28993049 |
| O173  | 6.96237903  | -2.15517986 | 1.77440053  | O191 | 0.02796491 | -3.16179328 | 1.90809084  |
| H174  | 7.04815228  | -2.25207847 | 2.73900949  | H192 | 0.25616440 | -3.99405288 | 1.43839920  |
| H175  | 6.10207876  | -2.58601016 | 1.56164548  | H193 | 1.47430763 | -2.46114734 | 1.71776708  |
| O176  | 1.32084232  | 0.86955387  | 6.52540652  | O194 | 3.03099097 | -8.34163371 | 0.41043415  |
| H177  | 1.02922563  | 0.63379739  | 7.42280609  | H195 | 3.43575401 | -7.43924382 | 0.44459555  |
| H178  | 1.14469598  | 0.08106315  | 5.95211509  | H196 | 3.74269031 | -8.95245300 | 0.64925370  |
| O179  | 3.14854302  | 3.22645518  | 8.51754271  | O197 | 0.59313365 | -4.01899109 | 4.49684971  |
| H180  | 3.92343685  | 3.34984305  | 9.10832689  | H198 | 1.52752054 | -4.08539231 | 4.21403560  |
| H181  | 2.52490137  | 2.71525334  | 9.06837619  | H199 | 0.99528378 | -2.22939060 | 5.12271163  |
| O182  | 5.34957459  | 2.60415208  | 10.10610131 | H200 | 3.33032427 | -2.63354585 | 6.90786994  |
| H183  | 5.36142599  | 1.74364420  | 9.63213292  | H201 | 2.40797055 | -1.56520848 | 5.99192009  |
| H184  | 5.95054438  | 2.47165167  | 10.86451085 | H202 | 9.33629505 | -5.06013036 | 10.75456208 |
| O185  | 2.41703359  | -2.09107285 | 1.72842838  |      |            |             |             |
| H186  | 3.06722313  | -2.81184188 | 1.48582474  |      |            |             |             |

Table S1. Energies to build the energy diagram.

|                                                          |                 | Energy       | ZPE      | Solvation | Energy              | VDW       | Sum          | Sum'         |
|----------------------------------------------------------|-----------------|--------------|----------|-----------|---------------------|-----------|--------------|--------------|
|                                                          |                 | B3LYP        | B3LYP    | B3LYP     | B3LYP*              | D2        |              | (no ZPE)     |
|                                                          |                 | lacvp*       | lacvp*   | lacvp*    | cc-pvtz(-f)/lacv3p+ |           |              |              |
| H <sub>2</sub> O                                         | <sup>1</sup> A  | -76.407002   | 0.021131 |           | -76.417655          |           | -76.418834   | -76.439965   |
| O <sub>2</sub>                                           | <sup>3</sup> A  | -150.316623  | 0.003775 |           | -150.304632         |           | -150.319980  | -150.323755  |
| S <sub>3</sub> <sup>-1</sup>                             | <sup>13</sup> A | -5851.626273 | 1.639543 | -0.110373 | -5850.687813        | -0.407863 | -5849.566506 | -5851.206049 |
| S <sub>4</sub> <sup>0</sup> RE(O-O)                      | <sup>14</sup> A | -5851.405693 | 1.640667 | -0.127515 | -5850.457476        | -0.404542 | -5849.348867 | -5850.989534 |
|                                                          | <sup>12</sup> A | -5851.419345 | 1.640821 | -0.126868 | -5850.474186        | -0.405500 | -5849.365733 | -5851.006554 |
|                                                          | <sup>6</sup> A  | -5851.421262 | 1.640866 | -0.127167 | -5850.475836        | -0.405475 | -5849.367612 | -5851.008478 |
| S <sub>4</sub> <sup>0</sup> TS(O-O)                      | <sup>6</sup> A  | -5851.411180 | 1.639692 | -0.128522 | -5850.462537        | -0.405005 | -5849.356372 | -5850.996064 |
| S <sub>4</sub> <sup>0</sup> O <sub>2</sub> <sup>2-</sup> | <sup>6</sup> A  | -5851.439270 | 1.640796 | -0.130171 | -5850.481900        | -0.401059 | -5849.372334 | -5851.013130 |
| S <sub>4</sub> <sup>0</sup> TS(O <sub>2</sub> )          | <sup>6</sup> A  | -5851.431681 | 1.639456 | -0.126148 | -5850.462088        | -0.402893 | -5849.351672 | -5850.991128 |
| S <sub>0</sub> <sup>0</sup> RE(H <sup>+</sup> )          | <sup>16</sup> A | -5777.568224 | 1.659663 | -0.125665 | -5776.599913        | -0.398662 | -5775.464577 | -5777.124240 |
| S <sub>0</sub> <sup>0</sup> TS(H <sup>+</sup> )          | <sup>16</sup> A | -5777.569945 | 1.656919 | -0.124173 | -5776.601116        | -0.398618 | -5775.466988 | -5777.123907 |

## Alternative TS(O-O) as shown in Figure 6 D.

$S_4^0$  TS(O-O) between the outer oxyl radical and inner oxo bridge, +1.1 kcal/mol higher than  $S_4^0$  TS(O-O) between the inner oxyl radical and outer oxo bridge.

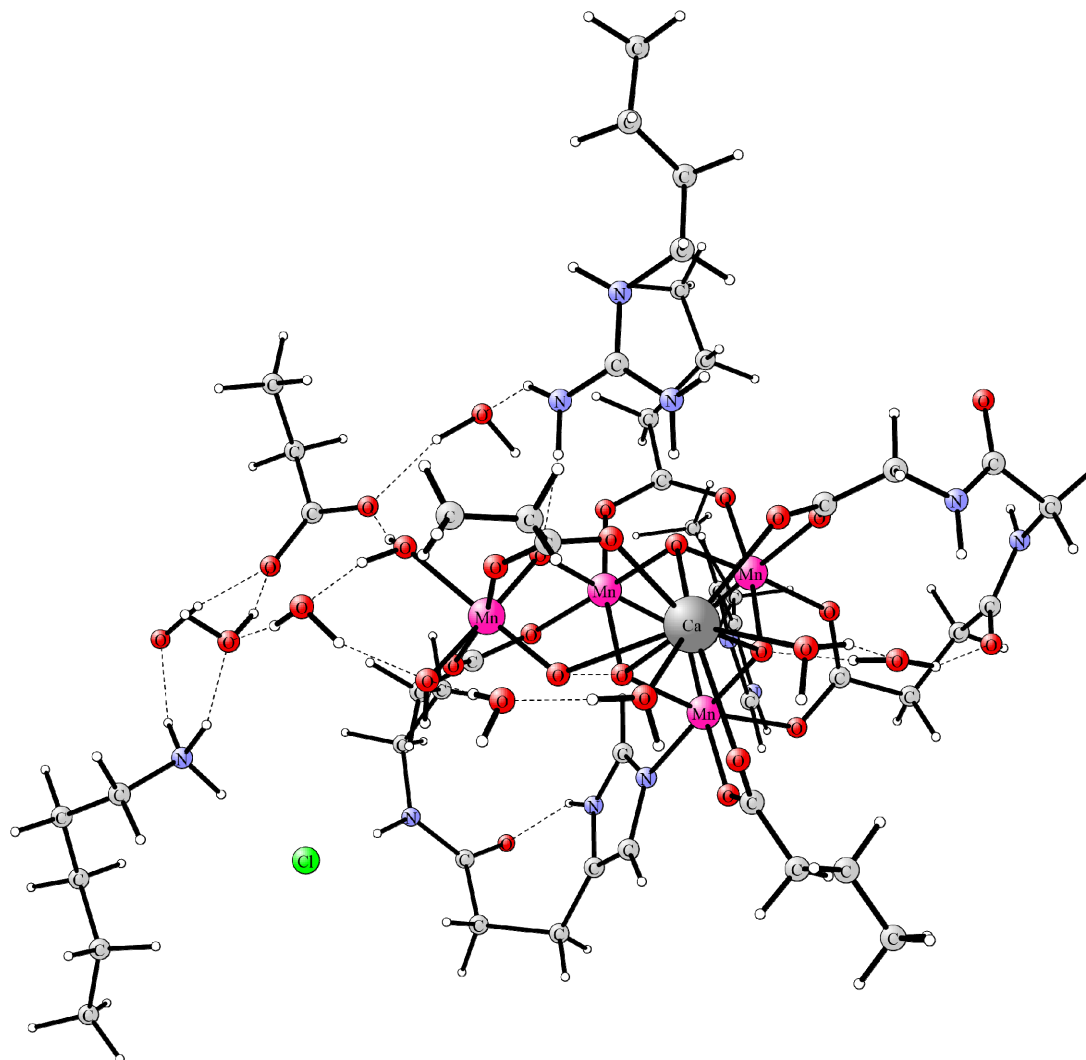

|     |             |             |            |     |            |             |             |
|-----|-------------|-------------|------------|-----|------------|-------------|-------------|
| Mn1 | 2.66407300  | -1.44162300 | 4.08842100 | O18 | 3.13325200 | 1.87308400  | 4.53343800  |
| Mn2 | 4.64499600  | -1.45971800 | 8.58162600 | O19 | 2.15096900 | 0.23406400  | 3.34217700  |
| Mn3 | 5.30069500  | -1.50146700 | 5.69401900 | C20 | 1.05826500 | 1.18289500  | 13.45621700 |
| Mn4 | 6.65096200  | 0.10400600  | 7.50006900 | H21 | 0.37021000 | 0.36015900  | 13.58249700 |
| O5  | 3.83294200  | -1.35311500 | 6.84852100 | H22 | 0.73366100 | 2.12914400  | 13.86359100 |
| O6  | 5.74174800  | 0.26089700  | 5.98135500 | H23 | 1.95117700 | 0.90708800  | 14.03694600 |
| O7  | 5.12578400  | 0.32105000  | 8.46419700 | C24 | 1.45168600 | 1.27375200  | 11.96547300 |
| O8  | 6.16408900  | -1.74943200 | 7.48933500 | H25 | 2.24743700 | 2.01675400  | 11.82741600 |
| Ca9 | 3.42223700  | 1.33634300  | 6.85737900 | H26 | 0.59865100 | 1.60710800  | 11.36212200 |
| C10 | 0.66765300  | 1.95117500  | 1.70645900 | C27 | 1.94083500 | -0.09310700 | 11.45758700 |
| H11 | 1.22513700  | 1.90593300  | 0.78254000 | H28 | 1.12372500 | -0.82883200 | 11.50906000 |
| H12 | -0.32435100 | 2.36874600  | 1.61430400 | H29 | 2.72828100 | -0.48606200 | 12.11165400 |
| H13 | 0.45739200  | 0.89753600  | 1.92861800 | C30 | 2.48359400 | -0.14459700 | 10.03368600 |
| C14 | 1.47332400  | 2.49229600  | 2.89591900 | O31 | 2.22673600 | 0.71365900  | 9.17865200  |
| H15 | 0.79271700  | 2.87130400  | 3.66963900 | O32 | 3.22525900 | -1.19578400 | 9.79961900  |
| H16 | 2.12482400  | 3.33351700  | 2.63304100 | C33 | 2.78434400 | -7.86067400 | 8.62583600  |
| C17 | 2.34317000  | 1.47397600  | 3.65495600 | H34 | 2.49869200 | -8.81976800 | 9.07453000  |

|     |             |             |             |      |             |              |             |
|-----|-------------|-------------|-------------|------|-------------|--------------|-------------|
| H35 | 1.94107200  | -7.52321500 | 8.01526200  | H98  | 9.13455200  | -1.73712200  | 3.53264400  |
| C36 | 4.02102800  | -8.07284300 | 7.74597800  | C99  | 8.19395200  | -1.24124500  | 5.36294300  |
| O37 | 5.16076200  | -8.17646600 | 8.25654400  | O100 | 7.11676700  | -1.74577000  | 4.89540500  |
| C38 | 3.06849600  | -6.86238200 | 9.78918700  | O101 | 8.29034900  | -0.54231800  | 6.41739900  |
| H39 | 3.73287800  | -7.35540500 | 10.50882500 | C102 | 10.81873400 | 4.22853500   | -0.81501400 |
| H40 | 2.12915400  | -6.65430300 | 10.30963400 | H103 | 11.54037000 | 3.48392900   | -0.51313100 |
| C41 | 3.69721600  | -5.56231600 | 9.36480400  | H104 | 11.20108300 | 5.23063200   | -0.68823000 |
| N42 | 4.90846700  | -5.58376300 | 8.69417600  | H105 | 10.67558600 | 4.10239600   | -1.89537900 |
| H43 | 5.38212200  | -6.47124200 | 8.46911000  | C106 | 9.47634700  | 3.97927700   | -0.09532400 |
| C44 | 3.35798900  | -4.22906000 | 9.43735400  | H107 | 8.99953400  | 3.09986400   | -0.55363100 |
| H45 | 2.50469200  | -3.75291100 | 9.89347000  | H108 | 8.79344600  | 4.82104700   | -0.27262400 |
| C46 | 5.23156000  | -4.33962600 | 8.33263300  | C109 | 9.62762100  | 3.75244800   | 1.41780600  |
| H47 | 6.04904100  | -4.09365100 | 7.68348600  | H110 | 10.14205100 | 4.61651500   | 1.85802700  |
| N48 | 4.33035200  | -3.47886300 | 8.79027300  | H111 | 10.27191900 | 2.88275500   | 1.60555700  |
| N49 | 3.82472700  | -8.01169300 | 6.42271700  | C112 | 8.31806600  | 3.58228900   | 2.20474000  |
| H50 | 2.86006600  | -7.95790900 | 6.05426900  | H113 | 7.64626500  | 4.42589800   | 1.98424700  |
| C51 | 4.91755300  | -7.84623300 | 5.46887900  | H114 | 8.54603900  | 3.60841200   | 3.27523700  |
| H52 | 4.63456000  | -8.35895000 | 4.54369400  | N115 | 7.63155000  | 2.30748100   | 1.94521500  |
| H53 | 5.81163200  | -8.32403600 | 5.87385900  | H116 | 7.67739600  | 1.92084600   | 1.01174100  |
| C54 | 5.20648100  | -6.33890700 | 5.18983900  | C117 | 6.71434700  | 1.76126200   | 2.77765600  |
| H55 | 6.02099000  | -6.27388900 | 4.45664800  | N118 | 6.36112000  | 2.41750600   | 3.89368900  |
| H56 | 5.59286500  | -5.89683200 | 6.11162600  | H119 | 5.82217600  | 1.93814600   | 4.61099300  |
| C57 | 3.99136100  | -5.52132200 | 4.69595600  | H120 | 6.40917200  | 3.42267000   | 3.95660000  |
| H58 | 3.06320400  | -5.85339800 | 5.17922500  | N121 | 6.17132900  | 0.57333600   | 2.51729600  |
| H59 | 3.82516800  | -5.68081100 | 3.62283100  | H122 | 6.64079500  | -0.19613200  | 2.01101800  |
| C60 | 4.03815200  | -4.00102800 | 4.87988000  | H123 | 5.43676300  | 0.22130800   | 3.13927200  |
| O61 | 3.00267700  | -3.37276500 | 4.48920800  | C124 | 11.84244700 | -5.39311800  | 7.24929500  |
| O62 | 5.06293400  | -3.46038100 | 5.40854700  | H125 | 11.25217800 | -5.97244000  | 6.55469900  |
| C63 | 9.15949800  | 0.11914400  | 11.44782200 | H126 | 12.79646100 | -5.85244700  | 7.46172300  |
| H64 | 9.79003200  | -0.16288100 | 10.59876100 | H127 | 12.02109500 | -4.39279700  | 6.84295600  |
| H65 | 9.76291900  | -0.00422500 | 12.35751300 | C128 | 11.18947700 | -5.34932900  | 8.64557100  |
| C66 | 7.92757800  | -0.77458600 | 11.53739700 | H129 | 11.90948500 | -4.92422200  | 9.35940500  |
| H67 | 7.24846500  | -0.41396800 | 12.31608900 | H130 | 11.00768600 | -6.37908600  | 8.98129100  |
| H68 | 8.21260100  | -1.79505900 | 11.82307600 | C131 | 9.91984600  | -4.57651400  | 8.74648500  |
| C69 | 7.13521200  | -0.85022700 | 10.23874900 | N132 | 9.05555700  | -4.70372700  | 9.82933900  |
| O70 | 7.63495700  | -0.24134000 | 9.23672500  | C133 | 9.35848600  | -3.61643900  | 7.95131000  |
| O71 | 6.07798500  | -1.54597600 | 10.23923100 | H134 | 9.69488600  | -3.19436000  | 7.02013000  |
| C72 | 8.77896500  | 1.59649000  | 11.34849300 | C135 | 8.01909400  | -3.86285500  | 9.69272900  |
| O73 | 7.66666900  | 2.01262600  | 11.68826300 | H136 | 7.18489000  | -3.73852500  | 10.36590300 |
| N74 | 9.77096500  | 2.42481200  | 10.93981400 | N137 | 8.19559100  | -3.19403800  | 8.55842000  |
| H75 | 10.60755000 | 2.02272200  | 10.53900900 | H138 | 7.48895800  | -2.52991900  | 8.15110800  |
| C76 | 9.56769600  | 3.85878600  | 10.76514600 | C139 | 6.09855600  | -4.23516900  | -1.22214400 |
| H77 | 10.51583800 | 4.37370000  | 10.93037100 | H140 | 5.38344900  | -4.56843900  | -1.95933800 |
| H78 | 8.83999900  | 4.18517700  | 11.51106100 | H141 | 7.10947000  | -4.13021100  | -1.58863200 |
| C79 | 9.10729900  | 4.17428700  | 9.32772100  | H142 | 5.79325100  | -3.22307800  | -0.92797200 |
| O80 | 9.91942400  | 4.40810300  | 8.44062300  | C143 | 6.06497200  | -5.13755000  | 0.03501100  |
| N81 | 7.75584900  | 4.14943900  | 9.13932000  | H144 | 6.05638000  | -6.19660500  | -0.24033700 |
| H82 | 7.15887300  | 3.78409800  | 9.87282400  | H145 | 6.96315500  | -4.94509200  | 0.63365400  |
| C83 | 7.16761100  | 4.25110400  | 7.82140300  | C146 | 4.85373900  | -4.80686000  | 0.90956800  |
| H84 | 6.39386200  | 5.02380500  | 7.79206000  | O147 | 4.86886600  | -3.68226800  | 1.49069300  |
| H85 | 7.97501900  | 4.52945800  | 7.13561100  | O148 | 3.89762600  | -5.64137200  | 0.99302700  |
| C86 | 6.52808400  | 2.94236400  | 7.34055300  | C149 | -1.82881200 | -11.98640500 | 4.24869900  |
| O87 | 5.44731400  | 2.95698300  | 6.74102600  | H150 | -2.35863300 | -12.71815900 | 3.65628000  |
| O88 | 7.22784200  | 1.87755600  | 7.61752600  | H151 | -2.32848200 | -11.78331600 | 5.18422000  |
| C89 | 11.58174700 | -0.61712300 | 3.48092100  | H152 | -0.85443800 | -12.42134800 | 4.50974900  |
| H90 | 12.44418600 | -1.21807000 | 3.72839500  | C153 | -1.62859500 | -10.68116400 | 3.45257200  |
| H91 | 11.83037600 | 0.38213900  | 3.15519200  | H154 | -2.57899400 | -10.40622500 | 2.97128800  |
| H92 | 11.11660700 | -1.09676500 | 2.60866700  | H155 | -1.37873900 | -9.86518200  | 4.14170900  |
| C93 | 10.53957800 | -0.47583600 | 4.61343200  | C156 | -0.52135900 | -10.79805100 | 2.38853300  |
| H94 | 10.04398700 | 0.49674900  | 4.51225200  | H157 | 0.45694100  | -10.73007800 | 2.88475100  |
| H95 | 11.02016900 | -0.45513700 | 5.59782500  | H158 | -0.55813700 | -11.79705100 | 1.93220200  |
| C96 | 9.45303200  | -1.55788200 | 4.56465800  | C159 | -0.61267700 | -9.78189900  | 1.23587400  |
| H97 | 9.84035600  | -2.52658000 | 4.91725000  | H160 | 0.19041200  | -9.96818200  | 0.50885500  |

|      |             |             |            |      |             |             |             |
|------|-------------|-------------|------------|------|-------------|-------------|-------------|
| H161 | -1.55354800 | -9.95406800 | 0.69555000 | O182 | 5.24991900  | 2.47395200  | 10.26585600 |
| C162 | -0.60247100 | -8.29528200 | 1.59929900 | H183 | 5.28144600  | 1.64050500  | 9.74975800  |
| H163 | -0.84452300 | -7.70313100 | 0.71151000 | H184 | 5.91576000  | 2.35445800  | 10.96999100 |
| H164 | -1.33891600 | -8.05952200 | 2.37186400 | O185 | 3.00658500  | -1.89895300 | 2.14270000  |
| N165 | 0.71983600  | -7.79440400 | 2.10044600 | H186 | 3.62948100  | -2.66456900 | 1.97946200  |
| H166 | 0.79830900  | -6.77345200 | 1.91962600 | H187 | -0.03159000 | -0.46105300 | 4.50617200  |
| H167 | 0.83497600  | -7.93158300 | 3.14431600 | O188 | 2.31398300  | -0.94420400 | 5.74503100  |
| H168 | 1.53862100  | -8.19249300 | 1.58852100 | O189 | 1.28355500  | -5.20838200 | 1.04678300  |
| C169 | 0.92453100  | -7.79938200 | 5.17178400 | H190 | 2.28308000  | -5.23260100 | 1.14883600  |
| O170 | 0.82536900  | -1.90415900 | 3.92845500 | H191 | 1.15164400  | -5.32695300 | 0.09152400  |
| H171 | 0.37464900  | -2.29575100 | 2.19916700 | O192 | 0.61328100  | -2.49949000 | 1.26566000  |
| O172 | 4.47927500  | -1.10492800 | 4.20787100 | H193 | 0.71624400  | -3.47765400 | 1.24679200  |
| O173 | 7.03901500  | -2.00356300 | 1.96154700 | H194 | 2.13349500  | -2.08683100 | 1.66292200  |
| H174 | 6.97882300  | -2.11018300 | 2.92882700 | O195 | 3.04860200  | -8.21829600 | 0.57118500  |
| H175 | 6.29697300  | -2.56984400 | 1.63331400 | H196 | 3.48423200  | -7.33164500 | 0.62663800  |
| O176 | 0.97147700  | 1.54839000  | 6.83981300 | H197 | 3.73689000  | -8.85651400 | 0.80878400  |
| H177 | 0.42614100  | 1.12234000  | 6.12429000 | O198 | -0.45150800 | 0.36620100  | 4.85591500  |
| H178 | 0.69723400  | 1.12653000  | 7.66975500 | H199 | -1.37960900 | 0.14591900  | 5.02271400  |
| O179 | 3.16423400  | 3.20141600  | 8.53368400 | H200 | 0.70492300  | -2.67419800 | 4.51258000  |
| H180 | 3.92250200  | 3.27137100  | 9.15070200 | H201 | 9.17785700  | -5.34564700 | 10.60281300 |
| H181 | 2.45825800  | 2.82590300  | 9.08802100 |      |             |             |             |



Table S2. Energy of the alternative TS(O-O) (Figure 6 D).

|                                     |                | Energy       | ZPE      | Solvation | Energy              | VDW       | Sum          |
|-------------------------------------|----------------|--------------|----------|-----------|---------------------|-----------|--------------|
|                                     |                | B3LYP        | B3LYP    | B3LYP     | B3LYP*              | D2        |              |
|                                     |                | lacvp*       | lacvp*   | lacvp*    | cc-pvtz(-f)/lacv3p+ |           |              |
| S <sub>4</sub> <sup>0</sup> TS(O-O) | <sup>6</sup> A | -5851.404946 | 1.639222 | -0.134399 | -5850.461065        | -0.398394 | -5849.354636 |
